1     Title

2     Reward timing and its expression by inhibitory interneurons in the mouse primary visual cortex

3

4     Author Names

5     Kevin J Monk<sup>1-2</sup>, Simon Allard<sup>1-2</sup>, and Marshall G Hussain Shuler<sup>1-2</sup>

6

7     Affiliations and Addresses

8     (1) The Solomon H. Snyder Department of Neuroscience, The Johns Hopkins University

9         School of Medicine, 725 N Wolfe Street, Baltimore, MD 21205

10    (2) Kavli Neuroscience Discovery Institute, The Johns Hopkins University School of Medicine,

11         725 N Wolfe Street, Baltimore, MD 21205

12

13    Running Head

14    Reward timing in mouse visual cortex

15

16    Corresponding Author Address

17    Marshall G Hussain Shuler

18    725 N. Wolfe Street

19    WBSB 914

20    Baltimore, MD 21205

21    [shuler@jhmi.edu](mailto:shuler@jhmi.edu)

22

## 23 Abstract

24 Primary sensory cortex has historically been studied as a low-level feature detector, but has more  
25 recently been implicated in many higher-level cognitive functions. For instance, after an animal  
26 learns that a light predicts water at a fixed delay, neurons in primary visual cortex (V1) can  
27 produce “reward timing activity” (i.e., spike modulation of various forms that relate the interval  
28 between the visual stimulus and expected reward). The manner by which V1 produces these  
29 representations is unknown. Here, we combine behavior, *in vivo* electrophysiology, and  
30 optogenetics to investigate the characteristics of and circuit mechanisms underlying V1 reward  
31 timing in the head-fixed mouse. We find that reward timing activity is present in mouse V1, that  
32 inhibitory interneurons participate in reward timing, and that these representations are consistent  
33 with a theorized network architecture. Together, these results deepen our understanding of V1  
34 reward timing and the manner by which it is produced.

35

## 36 Introduction

37 Primary sensory cortex is classically regarded as a low-level feature detector providing simple  
38 representations for higher-order areas. In the visual system, representations in early areas relate  
39 to simple features, and through the cortical hierarchy, these signals are transformed into complex  
40 representations of the external world (Hubel and Wiesel, 1959, 1965; Felleman and Van Essen,  
41 1991). Yet, it is becoming increasingly clear that representations in primary sensory areas are  
42 updated when stimuli gain meaning through associative learning (McGann, 2015). Specifically,  
43 this is seen in primary gustatory (Vincis and Fontanini, 2016), somatosensory (Wiest et al., 2010;  
44 Gdalyahu et al., 2012; Pais-Vieira et al., 2013), auditory (Polley et al., 2004; Rutkowski and  
45 Weinberger, 2005; Guo et al., 2019), and visual (Shuler and Bear, 2006; Gavornik and Bear,  
46 2014a, 2014b; Makino and Komiyama, 2015; Goard et al., 2016; Goltstein et al., 2018) cortices,  
47 and in the olfactory bulb (Kay and Laurent, 1999; Kass et al., 2013; Ross and Fletcher, 2018).

48 Previous work shows that individual neurons in rodent primary visual cortex (V1) express reward  
49 timing activity (Shuler and Bear, 2006; Chubykin et al., 2013; Liu et al., 2015; Zold and Hussain  
50 Shuler, 2015). Reward timing activity is a representation of time between a visual stimulus and a  
51 reward, expressed as one of three forms: 1) a sustained increase (SI) or 2) sustained decrease  
52 (SD) of activity until the time of expected reward, or 3) a peak (PK) of activity around the time of  
53 the expected reward. Prior studies advance V1 as a substrate in the learning of this timing activity  
54 and implicate acetylcholine as a reinforcing signal: lesions of cholinergic axons within V1 block  
55 the ability for V1 to learn reward timing activity (Chubykin et al., 2013); pairing visual stimuli with  
56 local activation of cholinergic fibers in V1 mimics behaviorally-conditioned reward timing (Liu et  
57 al., 2015); V1 timing activity correlates with timing behavior and perturbation of this activity lawfully  
58 shifts timing behavior (Namboodiri et al., 2015; Levy et al., 2017).

59  
60 These observations implicate V1 as a substrate for learning reward timing activity—thought to  
61 occur through a reinforcement learning process (Hussain Shuler, 2016)—but it remains unclear  
62 how V1 circuitry produces reward timing activity with its various response forms. A computational  
63 model proposes a solution with a specific connectivity motif within a network of excitatory and  
64 inhibitory cells (Huertas et al., 2015). This network architecture has two implications: (1) inhibitory  
65 interneurons represent time predominantly as the SI form and (2) neurons inhibited by  
66 interneurons represent time predominantly as the SD or PK form. In this network, interneurons  
67 are treated as one, monolithic group. However, V1 interneurons fall mainly into one of three  
68 subpopulations expressing either parvalbumin (PV), somatostatin (SOM), or vasoactive intestinal  
69 polypeptide (VIP) (Xu et al., 2010; Tremblay et al., 2016). Each are unique in their connectivity  
70 patterns (Pfeffer et al., 2013) and are functionally distinct during stimulus representation in V1  
71 (Atallah et al., 2012; Lee et al., 2012; Wilson et al., 2012). It is unknown if either of the model's  
72 implications are borne out *in vivo* and, if so, how the diversity of interneuron subtypes intersects  
73 with these implications.

74 Here we enrich our understanding of V1 reward timing by investigating the manner by which  
75 mouse V1 neurons produce reward timing activity, how different interneuron populations express  
76 and aid in the production of this activity, and how well biological and computational data accord  
77 with one another. In doing so, we find that V1 neurons express reward timing in a manner  
78 consistent with a theorized network architecture and that PV+ interneurons fulfill the expectations  
79 of the theorized inhibitory population.

80

## 81 Results

82 The means by which the primary visual cortex produces the various forms of reward timing  
83 observed is unknown. We have investigated potential mechanisms through an in-depth  
84 characterization of reward timing in the mouse primary visual cortex and how this reward timing  
85 activity is expressed by inhibitory interneurons (Figure 1A for a recording schematic). Specifically,  
86 we use mice which selectively express channelrhodopsin-2 (ChR2) in interneuron subpopulations  
87 to determine how these different cell types produce and aid in the production of reward timing  
88 activity (Figure 1B). Finally, with these data we sought to compare the activity of interneuron  
89 populations with a proposed network architecture which replicates reward timing activity (Figure  
90 1C, (Huertas et al., 2015)).

91

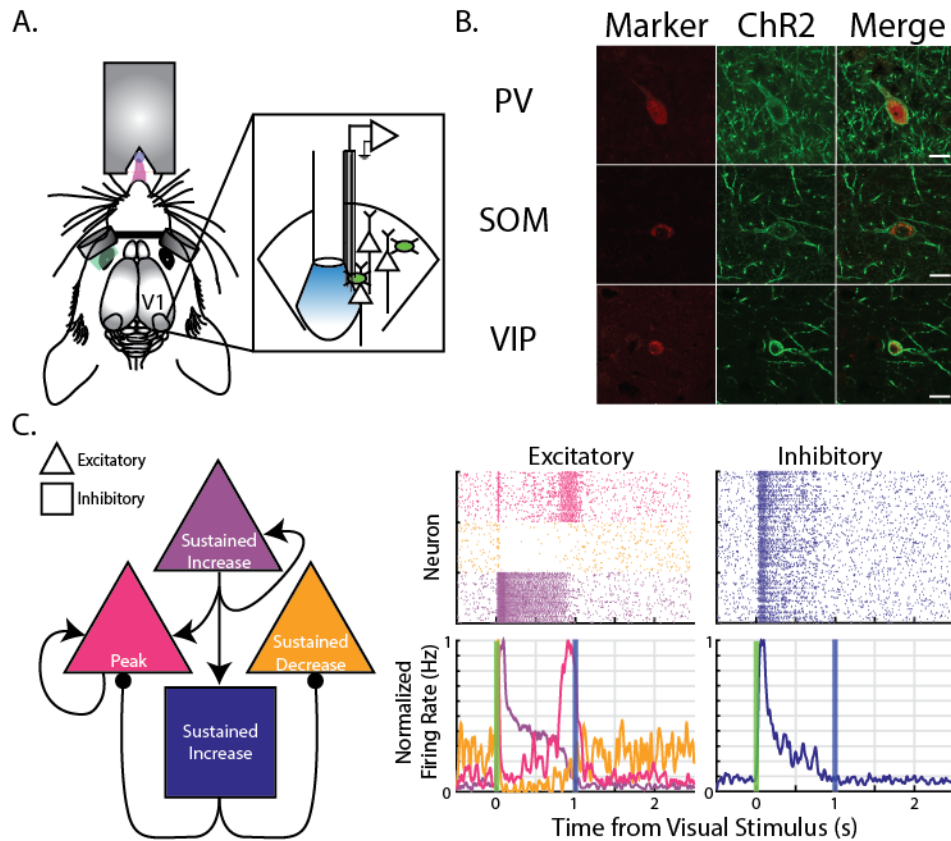

**Figure 1: Summary of recording strategy and motivation to investigate inhibitory interneurons.** (A) Cartoon schematic showing recording design. Head-fixed mice were required to lick following presentation of visual stimuli to receive a water reward after a fixed delay. Simultaneously, electrophysiological recordings were made in infragranular primary visual cortex. Depending on genotype, mice expressed channelrhodopsin-2 in inhibitory interneurons (schematized in green). (B) Channelrhodopsin-2 (ChR2) expression co-localizes with expected interneuron marker given animal's genotype. Specifically, in PV-ChR2 animals, there was co-expression of PV and ChR2 (top row), in SOM-ChR2 animals there was co-expression of SOM and ChR2 (middle row), and in VIP-ChR2 animals, there was co-expression of VIP and ChR2 (bottom row). Scale bars in right column represent 15 μm. (C) Left: Schematic of the theorized network architecture. This architecture is composed of three populations of excitatory cells (triangles) and one population of inhibitory cells (square). Right: Following training of the model, simulated excitatory neurons produce reward timing responses in one of three forms (left), and simulated inhibitory units produce Sustained Increase reward timing responses. Schematic on left adapted from Huertas et al., 2015; plots on right simulated as in Huertas et al., 2015.

92

93

94 *Head-Fixed Mice Associate a Visual Stimulus with a Delayed Reward*

95 Prior to investigating the circuit mechanisms by which primary visual cortex (V1) produces reward  
96 timing, we first established its existence within the head-fixed mouse preparation. Mice were  
97 trained to associate a water reward with visual stimuli (see Methods). Briefly, head-restrained  
98 mice received a 100ms visual stimulus delivered to the left or right eye with equal probability (Cue  
99 1 and Cue 2, respectively) via head-mounted goggles and received water from a lick port placed  
100 within reach of the tongue. Trials were initiated after a lapse of time comprising a randomly  
101 selected interval and a second random interval less than the ITI during which the animal must not  
102 lick (a “lick lockout” interval). If an animal licked during this lick lockout, the lockout timer would  
103 restart. Such an ITI encourages mice to cease licking and to wait for the onset of the next trial.  
104 Upon the initiation of a trial, animals received a monocular visual stimulus delivered to the left or  
105 right eye with equal probability, after which the animal was required to make at least one lick  
106 within the subsequent delay period so that reward could be delivered at the end of the delay. On  
107 half of these trials, if the animals met this behavioral requirement, they received a small water  
108 reward (~2 $\mu$ L) at the end of the conditioned interval (so-called “paired” trials). On the other half of  
109 these trials, regardless of lick behavior, reward was withheld (“catch” trials). On 20% of trials,  
110 neither a visual stimulus nor a reward were delivered although the intertrial interval and lick lockout  
111 periods expired successfully; these trials are referred to as “sham” trials and are used to verify  
112 that animals are using visual stimuli to guide licking behavior (as opposed to timing lick bouts from  
113 events other than a visual cue). The delay time used was the same for both visual stimuli within  
114 a recording session and varied across days, as follows: on short delay sessions the delay time  
115 was 1 second following visual stimulus offset, and on long delay sessions the delay time was 1.5  
116 seconds following visual stimulus offset. A task schematic is shown in Figure 2A and behavior  
117 from an example session is shown in Figure 2B. Regardless of trial type, trials in which the animal  
118 made a lick during the delay window are defined as Hit trials and trials in which the animal did not  
119 lick were referred to as Miss trials. All data presented here, unless otherwise noted, are from

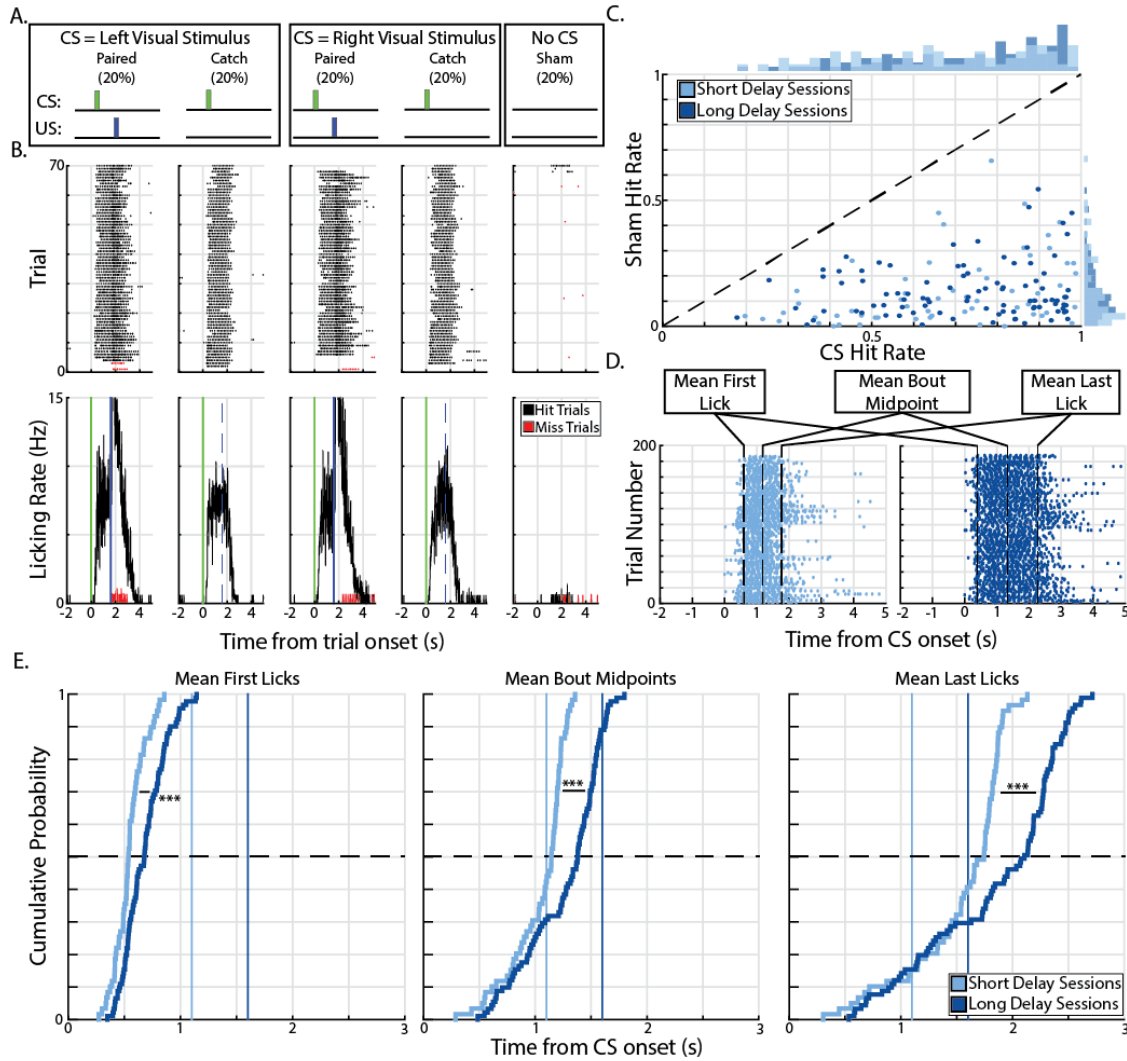

**Figure 2: Head-fixed mice learn the reward timing task.** (A) Animals were trained that a monocular visual stimulus (the conditioned stimulus, CS) delivered to the left or right eye predicted a water reward (the unconditioned stimulus, US) at a fixed delay. Upon receipt of the CS, animals were required to lick during the delay period so that reward could be delivered at the end of the short or long delay. Trials in which the reward is delivered are Paired trials and trials in which the reward is withheld are Catch trials. Trials in which no CS nor US were delivered are Sham trials and are used to determine the ability of the animal to use the visual stimulus to guide licking behavior. (B) Example licking behavior for a single animal during a single session of the task for all trial types with respect to the onset of the CS (time 0, green line). Blue lines represent time of reward delivery (solid line representing the receipt of reward on paired trials and dashed line representing expected time of reward on catch trials). Top: raster plot of licking behavior where black dots are licks recorded during “Hit” trials (i.e., trials in which the animal licked during the delay window) and red dots are licks recorded during “Miss” trials (i.e., trials in which the animal did not lick in the delay window). Bottom: PSTH’s calculated from licking activity, color scheme as noted above. (C) Scatter plot of session hit rates (probability of licking on a given trial) for all trials in which the CS is delivered (CS Hit Rate) and for all trials in which the CS was withheld (Sham Hit Rate) for short delay sessions (light blue) and long delay sessions (dark blue). Histograms of hit rates for each trial category shown in margins and unity line is the black, dashed line. (D) Behavioral measurements (labelled, black dashed lines) for example licking behavior during Catch+Hit trials from a short delay session (left, light blue raster) and a long delay session (right, dark blue raster). (E) Cumulative distribution plots for the three behavioral measurements measured during Catch+Hit trials during short delay sessions (light blue) and long delay sessions (dark blue). Vertical lines represent reward time and horizontal line indicates the median values. \*\*\* -  $p < 0.001$ , Wilcoxon rank-sum test.

121 Catch+Hit trials (i.e., trials in which the animal received a visual stimulus, licked during the delay,  
122 and did not receive a reward).

123  
124 As expected, animals showed a high probability of licking in the delay period on trials where a  
125 visual stimulus was delivered (“CS trials”) and a low probability of licking during the sham trials  
126 (70.67% and 14.04%, respectively, Figure 2B and 2C). There is a significant effect of trial type  
127 (i.e., CS trial vs sham trial,  $\chi^2(1, 286) = 464.11$ ,  $p = 7.83 \times 10^{-62}$ , Kruskal-Wallis test) on the  
128 probability that an animal licks while there is neither a significant effect of session number nor a  
129 significant interaction (Session Number:  $\chi^2(8, 286) = 0.51$ ,  $p = 0.85$ ; Interaction:  $\chi^2(8, 286) = 1.26$ ,  
130  $p = 0.26$ , Kruskal-Wallis test). These results demonstrate that animals lick in response to reward-  
131 predicting visual stimulation and that their behavior had reached asymptotic performance at the  
132 time of recording.

133  
134 We next addressed whether the animals time their behavioral response. To quantify the timing of  
135 the licking behavior, we made three measurements: the time of the first lick in a bout, the time of  
136 the last lick in a bout, and the mean time between the first and last lick in a bout (Bout Midpoint).  
137 The Bout Midpoint is derived from the initiation and cessation of licking, and so is not an  
138 independent measure. Rather, its inclusion is simply to determine whether the centering of lick  
139 bouts is in good accordance with the expected time of reward. These values were recorded across  
140 trials and an average of these values were calculated for a given trial type on a given day (Figure  
141 2D for example sessions). When we compare these values, we find that the lick initiation and  
142 cessation times (and, consequently, the Bout Midpoint) are significantly smaller for short delay  
143 sessions compared to long delay sessions (Figure 2E, Mean First Licks:  $Z = -6.09$ ,  $p = 1.11 \times 10^{-9}$ ;  
144  $^{\circ}$ ; Mean Bout Midpoints:  $Z = -6.71$ ,  $p = 2.01 \times 10^{-11}$ ; Mean Last Licks:  $Z = -5.73$ ,  $p = 9.89 \times 10^{-9}$ ,  
145 Wilcoxon rank-sum test) indicating that animals adapt their licking behavior based on the  
146 expected time to reward.



147 *Neurons in Primary Visual Cortex of the Head-Fixed Mouse Express Reward Timing Activity*

148 These behavioral data indicate that animals express an internal sense of the time interval between  
149 the visual stimulus and the water reward. To determine what, if any, neural representation of time  
150 was present in V1, we recorded single unit activity bilaterally during behavioral sessions. Previous  
151 work from our lab has shown that, in similar tasks, neurons in V1 of freely-moving rats and mice  
152 represent the time interval to an expected reward in one of three forms: a sustained increase (SI)  
153 or sustained decrease (SD) of activity until the time of reward, or as a peak (PK) of activity around  
154 the time of reward (Shuler and Bear, 2006; Chubykin et al., 2013; Liu et al., 2015). These  
155 response forms were also observed here in the head-fixed mouse (Figure 3A). Using these  
156 response forms, we manually classified in a blinded fashion the peristimulus time histograms  
157 (PSTHs) of neurons for both Cue 1 and Cue 2 Catch+Hit trials (i.e., trials in which the animal  
158 received a visual stimulus, licked during the delay window, and did not receive a water reward at  
159 the end of that delay; see Methods). PSTHs created from Sham+Hit trials (that is, trials in which  
160 neither CS nor US was delivered, but had licks within the delay window) were also blindly  
161 classified as a control. Neurons could be classified as responsive during any of these trial types;  
162 as such, we began our analyses by quantifying “neural records” (i.e., a given pattern of activity a  
163 neuron produced during a trial type).

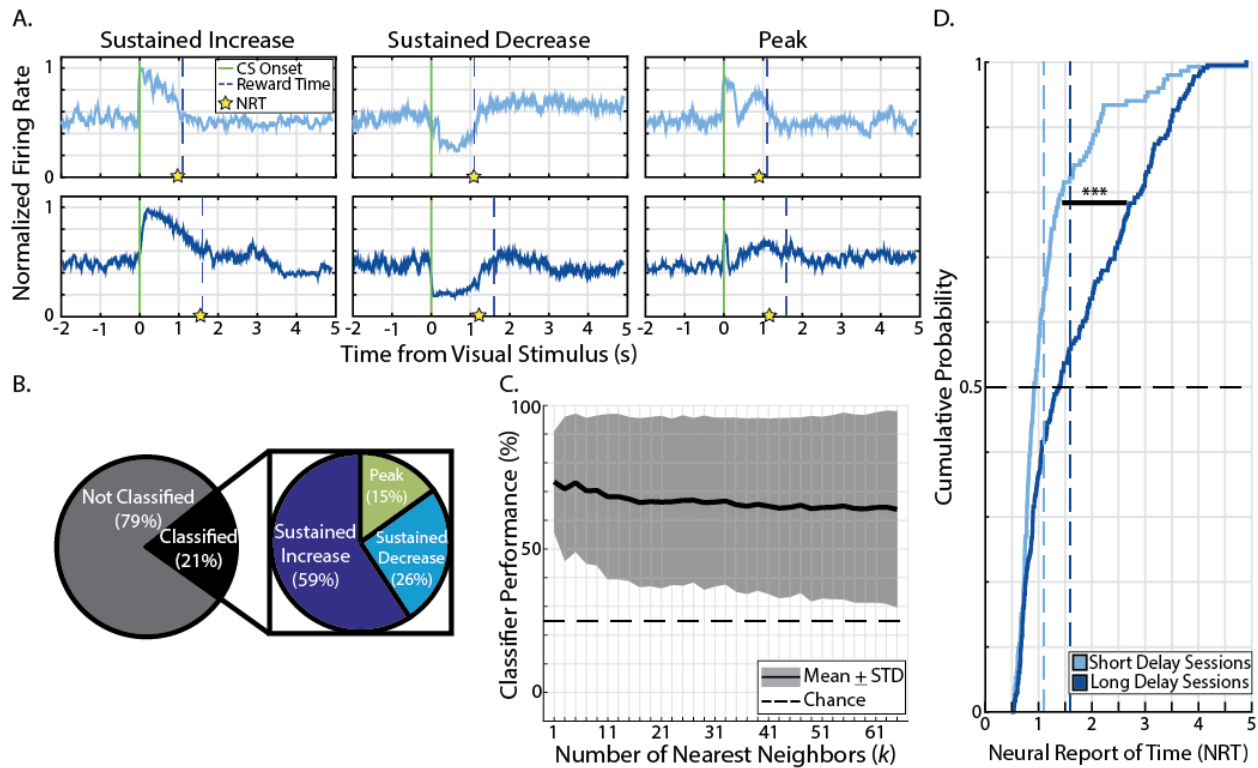

**Figure 3: Neurons in primary visual cortex express reward timing activity in three forms.** (A) Six example neurons representing the three forms of reward timing: Sustained Increase (left), Sustained Decrease (middle), and Peak (right) recorded from short delay sessions (light blue, top row) or long delay sessions (dark blue, bottom row). Activity is recorded from Catch+Hit Trials, normalized by AUC, and is plotted with respect to CS onset (green, vertical line). Dashed, vertical lines represent the time of expected reward (i.e., the conditioned interval for the session). Calculated neural report of times (NRT) for these example neurons are shown as yellow stars on x-axis. (B) Pie charts showing proportion of responses which express reward timing (left) and, of those classified responses, the proportion of the three forms of reward timing (right). (C) Performance of kNN classifier across a range of  $k$  nearest neighbors. Thick black line represents average performance of classifier, shaded region represents the mean  $\pm$  standard deviation. Dashed horizontal line represents chance performance. (D) Cumulative distribution plots of the calculated neural reports of time calculated from Catch+Hit trials during short delay sessions (light blue) and long delay sessions (dark blue). Vertical lines show time of reward and horizontal line shows median values for distributions. \*\*\* -  $p < 0.001$ , Wilcoxon rank-sum test.

164

165

166 We recorded from 996 neurons in the primary visual cortex which yielded 1,992 neural records

167 from Catch+Hit trials (each neuron produced two neural records: one in response to Cue 1 and

168 one in response to Cue 2). Of these 1,992 neural records from Catch+Hit trials, 410 (20.58%)

169 were classified as expressing reward timing (i.e., were classified as SI, SD, or PK). These 410

170 records were expressed by 253 neurons (25.40% of the total recorded population). Among the  
171 410 records: 243 (59.27%) were classified as SI (47 neurons classified for one CS, 98 neurons  
172 classified for both CS's), 105 (25.61%) were classified as SD (33 neurons classified for one CS,  
173 36 neurons classified for both CS's), and 62 (15.12%) were classified as PK (30 neurons classified  
174 for one CS, 16 neurons classified for both CS's). Only 11 of 996 (1.10%) of the neural records  
175 from Sham+Hit trials were classified as one of the forms described above. Figure 3B shows the  
176 proportions of neural records classified. We cross-validated these classifications using a  $k$ -  
177 Nearest Neighbors (kNN) classifier that was trained on data from even trials to predict the reward  
178 timing expression of data from odd trials (see Methods). The classifier predictions matched well  
179 with the manual classification across a range of parameters ( $1 \leq k \leq 65$ , Figure 3C) arguing that  
180 neural activity within mouse V1 fall into distinct classes of reward timing activity, as previously  
181 reported (Shuler and Bear, 2006; Chubykin et al., 2013; Liu et al., 2015).

182  
183 Previous reward timing studies have shown that V1 reward timing corresponds to the delay to  
184 reward (Shuler and Bear, 2006; Chubykin et al., 2013). By ascribing to each neuron a “neural  
185 report of time” (NRT, the moment of time the neuron reports as the delay to expected reward, see  
186 Methods), we asked if timing activity to a given reward delay similarly emerges in the head-fixed  
187 mouse preparation. Should reward timing responses emerge to visual cues predicting a given  
188 delay, the central tendency of those cues' NRT distributions should correspond to that delay.  
189 Indeed, we find that the central tendencies for the NRT distributions accord well with the  
190 conditioned intervals and are significantly different for short and long delay sessions ( $Z = -4.95$ ,  $p$   
191  $= 7.49 \times 10^{-7}$ , Wilcoxon rank-sum test – Figure 3D). Furthermore, the NRTs calculated from the  
192 cross-validated responses described above also show similar significant changes in distributions  
193 (i.e., shorter for the short delay) across the range of values for  $k$  (all  $Z$ 's  $\leq -3.43$ , all  $p$ 's  $\leq 5.97 \times$   
194  $10^{-4}$ , Wilcoxon rank-sum test). This shifting of the NRT distributions across conditioned intervals  
195 is not explained by differences in licking behavior as licking alone has no effect on recorded neural

196 activity ( $p = 0.198$  Wilcoxon Sign Rank Test) and an animal's within-session licking behavior did  
197 not influence the calculated NRT ( $\chi^2(2, 1120) = 1.91, p = 0.385$ , Kruskal-Wallis Test, Figure 3,  
198 Supplemental Figure 1).

199  
200 In previous reports of reward timing, neurons showed “cue dominance” (i.e., expressing reward  
201 timing activity to one, but not both cues) when the two cues are paired with different delays. Here  
202 we find that when the two cues predict a reward at the same delay that neurons can express such  
203 cue-specificity in reward timing, but that there is an increase in neurons with reward timing to both  
204 cues. Specifically, we find that of the 253 neurons that have reward timing, 157 (62%) express  
205 reward timing to both cues and do so with notable similarity across cues (Figure 3, Supplemental  
206 Figure 2). The remaining 38% express reward timing to one, but not the other cue, despite the  
207 cues foretelling of the same magnitude and delay to reward. Additionally, we find that neurons  
208 have stable representations of time across days. Using a previously-described statistic based on  
209 waveform shape (the J3 statistic, (Moran and Katz, 2014)) we defined 100 pairs of putative  
210 repeatedly-recorded neurons across two consecutive sessions. Of the 77 pairs of reward timing  
211 responses across days, we find that 45 (58%) have notably similar reward timing responses  
212 across days (Figure 3, Supplemental Figure 3).

213  
214 Together, these data demonstrate that mouse V1 neurons are able to express reward timing  
215 activity following associative learning. Having established mouse V1 as a locus for such timing  
216 activity, we sought to investigate how inhibitory interneurons express and aid in the expression of  
217 this reward timing activity. Specifically, we turned to recent theoretical work which proposes a  
218 manner by which neurons in primary visual cortex could create such heterogeneous  
219 representations of time (Huertas et al., 2015).

220

221 *V1 Neurons Represent Reward Timing in a Manner Consistent with a Theorized Network*  
222 *Architecture*

223 Recent computational work posits that a simple network motif can produce reward timing activity  
224 with the three known response forms (Huertas et al., 2015). This network motif is derived from a  
225 recurrent network of excitatory cells with broad and sparse inhibition; it contains one population  
226 of inhibitory cells and three populations of excitatory cells which differ based on levels of recurrent  
227 excitation, non-recurrent excitation, and inhibition (schematized in Figure 1C). Two experimentally  
228 tractable implications of this network motif are: (1) inhibitory interneurons should represent reward  
229 timing predominantly as the sustained increase form and (2) neurons that are inhibited by  
230 interneurons should represent time predominantly as sustained decrease or peak forms. Here we  
231 test these predictions using mice which selectively express channelrhodopsin (ChR2) exclusively  
232 in one of three major interneuron subtypes: those expressing parvalbumin (PV), those expressing  
233 somatostatin (SOM), and those expressing vasoactive intestinal polypeptide (VIP, see Methods).  
234 By investigating the ability of each interneuron subtype to fulfill the model's implications, we are  
235 able to determine how known interneuron diversity intersects with the proposed network  
236 architecture.

237  
238 With selective ChR2 expression we are able to optogenetically identify interneurons within our  
239 recorded population (Figure 4A-4B, see Methods). We identified 35/185 (18.9%) PV+ neurons,  
240 15/361 (4.2%) SOM+ interneurons, and 0/203 (0%) VIP+ interneurons (example cells shown in  
241 Figure 4B). These proportions match the expected relative distribution given our recording depth  
242 (Tremblay et al., 2016). Additionally, a control cohort of animals (not expressing ChR2 in any cell  
243 population) resulted in 0/247 (0%) recordings returned as expressing ChR2 from these wildtype  
244 animals.

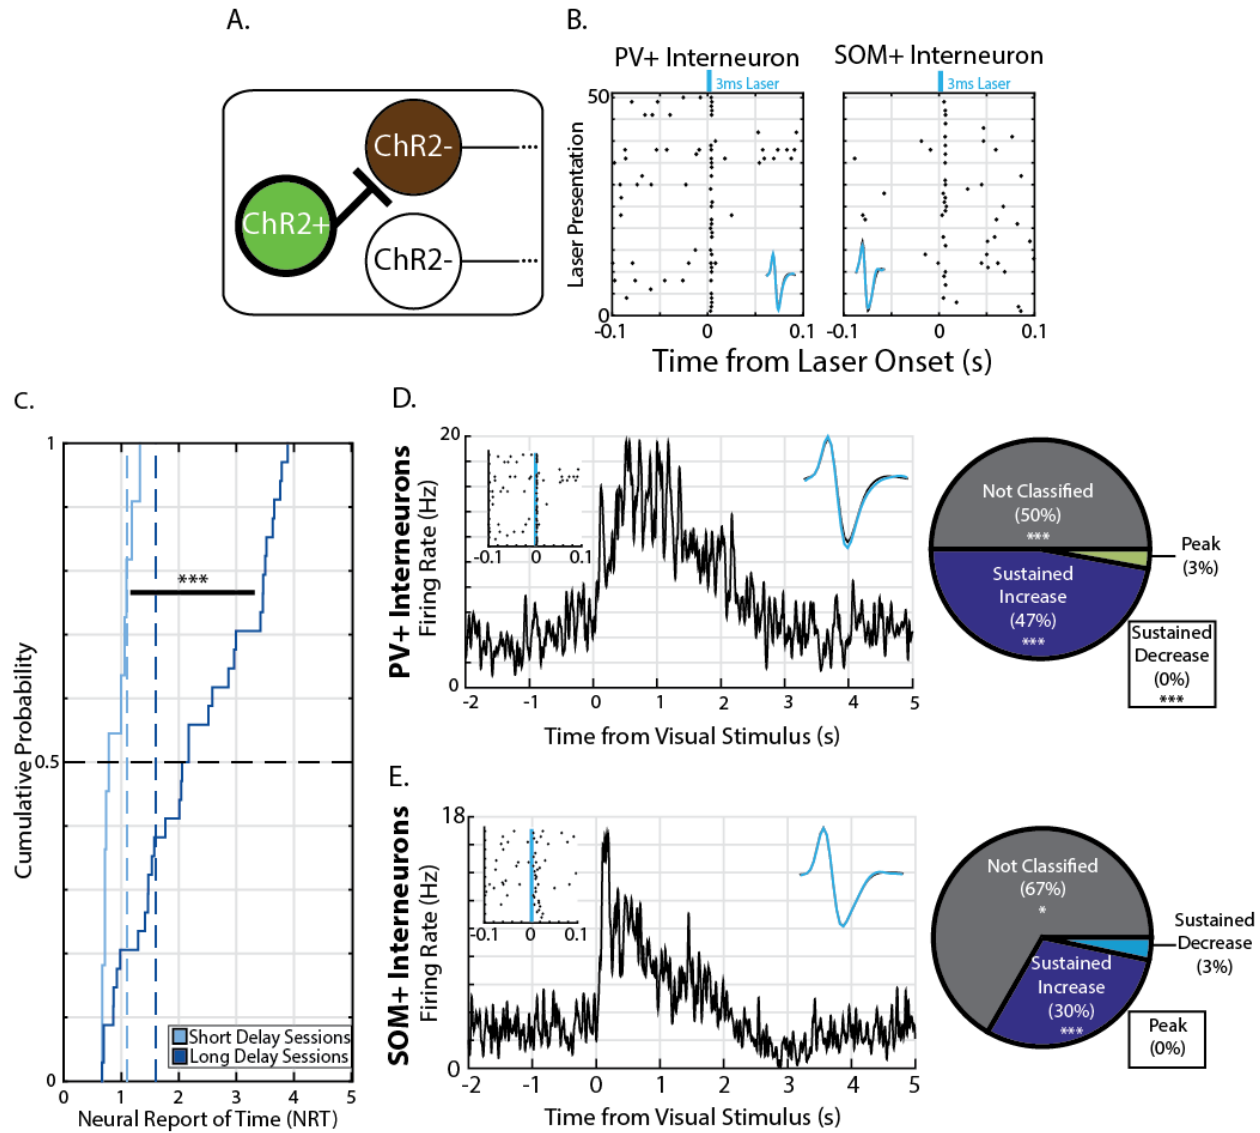

**Figure 4: Identified interneurons express reward timing as SI form, consistent with theorized network architecture.** (A) Cartoon showing the three types of cells we could possibly record from: ChR2-expressing (ChR2+, green), ChR2-negative which are inhibited by ChR2+ cells (ChR2-, brown), and ChR2-negative that are not inhibited by ChR2+ cells (ChR2-, white). Here we investigated reward timing in neurons expressing ChR2 as indicated with the bold lines around the ChR2+ population. (B) Two example raster plots of spikes recorded during "optotagging". Spikes are black dots plotted with respect to the time of a 3ms laser stimulus; this activity is recorded from a putative PV+ interneuron (left) and a putative SOM+ interneuron (right) and insets show average waveforms during laser stimulation (cyan) and average waveforms during spontaneous activity (black). (C) Cumulative distribution plots of NRTs calculated from identified interneurons during short delay sessions (light blue) or long delay sessions (dark blue). Vertical, dashed lines represent time of expected reward and horizontal, dashed line indicates median of the distributions. (D) Left: Example PV+ interneuron expresses reward timing as the Sustained Increase form. Inset in top left shows raster plot of spikes during optotagging and inset in top right shows average laser-evoked waveform and average spontaneous waveform (conventions as in B). Right: Pie chart showing proportions of responses from all PV+ interneurons which express reward timing and in what forms. (E) Same as E, but for SOM+ interneurons. \* -  $p < 0.05$ , \*\*\* -  $p < 0.001$ , Wilcoxon Rank-Sum test (C) or Bootstrap (D – E).

246 As we optogenetically identified PV+ and SOM+ interneurons, we were then able to ascertain  
247 their reward timing capabilities. We first determined their ability to produce representations of time  
248 and found that their NRTs shift across conditioned intervals ( $Z = -3.605$ ,  $p = 3.117 \times 10^{-4}$ , Wilcoxon  
249 rank-sum test; Figure 4C). Again, we verified that these representations of time are unlikely to be  
250 explained by licking behavior as licking, by itself, had no significant effect on ongoing spiking  
251 activity ( $p = 0.355$ , Wilcoxon Sign Rank Test; Figure 4, Supplemental Figure 1). Having  
252 demonstrated that identified interneurons are expressing reward timing, we then asked what the  
253 distribution of reward timing forms are for the subpopulation of interneurons. We found that 1)  
254 PV+ interneurons are significantly more likely to represent the time interval than non-identified  
255 counterparts, and, that 2) they are significantly more likely to represent time as a sustained  
256 increase of activity ( $p = 8.10 \times 10^{-12}$ ,  $p = 6.33 \times 10^{-25}$ , respectively, bootstrap – Figure 4D). We  
257 then asked the same of SOM+ interneurons and found that, again, they are more likely to express  
258 reward timing and are significantly more likely to represent time as a sustained increase of activity  
259 ( $p = 0.018$ ,  $p = 3.61 \times 10^{-4}$ , respectively, bootstrap – Figure 4E). Additionally, although we did not  
260 optogenetically identify excitatory cells, we have identified a subpopulation of putative pyramidal  
261 cells using waveform shape. We did so, specifically, by using the spike width of a waveform to  
262 define a population of recorded cells as wide-spiking (Barthó et al., 2004). To determine the  
263 reward timing expression of putative pyramidal cells, we looked at neurons within the top quartile  
264 of the spike width distribution. As expected, we find that these neurons express reward timing in  
265 all forms (Figure 4, Supplemental Figure 2). These data are in accordance with the proposed  
266 network architecture which suggests that inhibitory interneurons should represent the time interval  
267 as the sustained increase form.

268  
269 An additional component of the theorized network architecture is that neurons whose spiking is  
270 inhibited by inhibitory neurons should express reward timing as either the sustained decrease or  
271 peak form. To investigate this prediction, we defined cells as “suppressed” by presenting

272 extended laser stimuli (100ms) and recording responses (see Methods). Consistent with this  
 273 prediction, we found that neurons which are inhibited by PV+ activation are significantly more  
 274 likely to represent the time interval as the sustained decrease form ( $p = 1.85 \times 10^{-4}$ , bootstrap;  
 275 Figure 5A). However, neurons that are inhibited by SOM+ activation were less likely to express  
 276 reward timing (i.e., were more likely to be not  
 277 classified,  $p = 1.61 \times 10^{-5}$ , bootstrap) and, contrary to  
 278 the model's prediction, were significantly less likely to  
 279 be classified as sustained decrease or peak ( $p = 7.49$   
 280  $\times 10^{-5}$  and  $p = 0.02$ , respectively, bootstrap; Figure  
 281 5B). Additionally, we find that neurons that are  
 282 inhibited by VIP+ activation are significantly more  
 283 likely to express reward timing ( $p = 0.018$ , bootstrap)  
 284 and have a significant enrichment of the sustained  
 285 increase form ( $p = 0.014$ , bootstrap; Figure 5C).  
 286 Together, these results show that PV+ interneurons  
 287 fulfill the expectations of the theorized interneuron  
 288 population and provide evidence in favor of the  
 289 proposed network architecture wherein the reward  
 290 timing forms arise due to the connectivity among  
 291 excitatory and inhibitory neurons within V1. In  
 292 addition, these results also point to functional  
 293 distinctions of interneuron subtypes in the production  
 294 of reward timing activity.

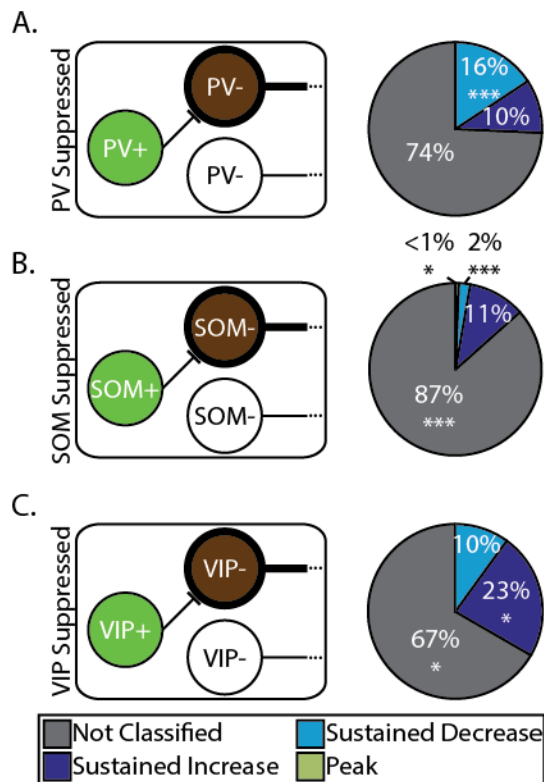

**Figure 5: Neurons inhibited by different interneuron subtypes express reward timing forms in varying proportions.** (A) Left: Cartoon schematizing specific PV- neurons of interest (i.e., those inhibited by PV+ interneurons); note that though cartoon shows monosynaptic inhibition, we are unable to address the mono- or polysynaptic nature of observed inhibition. Right: Pie chart showing proportion of responses which express reward timing and in what forms. (B) Same as A but for SOM- neurons which are inhibited by SOM+ activation. (C) Same as A but for VIP- neurons which are inhibited by VIP+ activation. \* -  $p < 0.05$ , \*\* -  $p < 0.01$ , \*\*\* -  $p < 0.001$ , bootstrap.



298 Discussion

299 Reward timing in the primary visual cortex is a network phenomenon that requires coordinated  
300 activity of various cell types. Here we have shown that reward timing exists in three forms in V1  
301 of head-fixed mice; that reward timing activity is expressed within identified interneuron  
302 subpopulations; and, that neurons that are inhibited by different interneuron subpopulations differ  
303 in their expression of reward timing. These findings are consistent with a theorized network  
304 architecture.

305

306 *Reward Timing in the Primary Visual Cortex of Head-Fixed Mice*

307 Head-fixed mice were trained to associate a visual stimulus with a delayed reward (Figure 2) and  
308 V1 neurons reflected this learned association in one of three forms (Figure 3). These results  
309 replicate previous reward timing reports in the primary visual cortex of freely-moving rats (Shuler  
310 and Bear, 2006; Chubykin et al., 2013) and mice (Liu et al., 2015), extend these reports to the  
311 head-fixed preparation, and add to reports of non-sensory representations within V1 (Ji and  
312 Wilson, 2007; Poort et al., 2015; Fiser et al., 2016; Pakan et al., 2018). As other sensory areas  
313 express altered representations following associative learning (McGann, 2015), our  
314 understanding of V1 reward timing allows for greater insight into how cortical circuits, generally,  
315 can create predictions of future events.

316

317 Though we contend that the production of reward timing in V1 is the result of interactions among  
318 cells within it, might it be that V1 is reflecting some non-specific global input signal (e.g., arousal  
319 or attention)? Our data argue that this alternate explanation is unlikely to be the case. First, a  
320 substantial fraction of neurons with reward timing show “cue dominance” (i.e., express reward  
321 timing to one, but not both cues, Figure 3 Supplemental Figure 2). Such specificity in reward  
322 timing is difficult to explain if V1 neurons were reflecting some non-specific, global signal. Second,  
323 we find that the expression of reward timing is unaffected by how engaged an animal is in our

324 task, as indicated by its licking behavior (a measure known to co-vary with other measures of  
325 arousal (Lee and Margolis, 2016)). The dissociation between licking and reward timing, then, is  
326 not consistent with a global signal being the cause of V1 reward timing activity.

327  
328 *V1 Neurons Express Reward Timing in a Manner Consistent with the Core Network Architecture*

329 Recent computational work has theorized a manner by which a network of cells can produce  
330 reward timing activity in the various forms observed (Huertas et al., 2015). The results of this  
331 formal model suggest that the heterogeneity of reward timing forms can be captured by a “core  
332 network architecture” where the relative amount of inhibition, recurrent excitation, and non-  
333 recurrent excitation differs according to a simple motif (Figure 1C). Here we sought to address  
334 two key implications of this model to determine potential biological validity of the proposed  
335 network architecture: 1) inhibitory interneurons should reflect reward timing predominantly as the  
336 sustained increase form and 2) neurons inhibited by interneurons should express reward timing  
337 predominantly as the sustained decrease or peak forms. Using selective expression of  
338 channelrhodopsin-2 (ChR2) in interneuron subpopulations, we are able to define these two  
339 populations (interneuron and suppressed) outside of behavioral conditioning and probe the  
340 reward timing expression in such populations. A simplifying assumption of the model is that all  
341 interneurons behave in a similar manner; however, it is known that there are various different  
342 interneuron subpopulations within V1 and that they have been shown to have different functional  
343 roles when the network represents sensory information (Atallah et al., 2012; Lee et al., 2012;  
344 Wilson et al., 2012; Kvitsiani et al., 2013). By selectively expressing ChR2 in specific interneuron  
345 subpopulations, we are able to address the model’s implications and determine how these activity  
346 patterns intersect with the various interneuron subtypes.

347  
348 Here we identify putative PV+ and SOM+ interneurons (Figure 7B-D) and find that PV+  
349 interneurons adhere to the model implications. They produce reward timing predominantly as the

350 sustained increase form (Figure 4D), and neurons that they inhibit produce reward timing with an  
351 enrichment of the sustained decrease form (Figure 5A). These results can be contrasted with  
352 SOM+ interneurons which, while expressing reward timing predominantly with the sustained  
353 increase form (Figure 4E), largely do not inhibit neurons which express reward timing (Figure 5B).  
354 Finally, the manner by which VIP+ interneurons express reward timing is unknown, but we have  
355 shown that those neurons inhibited by VIP+ activation express reward timing predominantly with  
356 the sustained increase form (Figure 5C). These results can be understood when known  
357 connectivity is incorporated into the network architecture, as discussed below.

358  
359 Inhibitory interneurons are known to have distinct connectivity among other interneurons and  
360 pyramidal cells (Pfeffer et al., 2013; Tremblay et al., 2016). For example, it is known that VIP+  
361 interneurons predominantly innervate other inhibitory interneurons (Pfeffer et al., 2013; Tremblay  
362 et al., 2016). As such, it follows that the neurons we defined as inhibited by VIP+ interneurons  
363 express reward timing in a manner similar to PV+ and SOM+ interneurons (i.e., with an  
364 enrichment of the sustained increase form). Additionally, the finding that PV+ and SOM+  
365 interneurons produce reward timing in a similar manner may be surprising as they are thought to  
366 perform different functions in stimulus representation (Atallah et al., 2012; Lee et al., 2012; Wilson  
367 et al., 2012). However, according to the theorized network architecture, interneurons express  
368 reward timing as the sustained increase form because they receive input from the excitatory  
369 population of sustained increase neurons (Figure 1C). Cortical interneurons are known to receive  
370 convergent input from local excitatory cells (Bock et al., 2011; Fino and Yuste, 2011; Hofer et al.,  
371 2011; Packer and Yuste, 2011). Specifically, a population of deep layer pyramidal cells has been  
372 shown to target both PV+ and SOM+ interneurons (West et al., 2006). Perhaps the similarity in  
373 reward timing expression in PV+ and SOM+ populations arises from similar pyramidal cell input  
374 to these interneurons. Additionally, if this input is shared with VIP+ interneurons, it would posit  
375 that VIP+ interneurons could also express reward timing as the sustained increase form. Thus,

376 functional differences would be borne out in downstream neurons (e.g., those neurons whose  
377 activity is suppressed by interneurons, Figure 5). Finally, when comparing between PV+ and  
378 SOM+ interneurons, PV+ interneurons act in a manner more consistent with the inhibitory  
379 population proposed in the core network architecture. This also can be understood when one  
380 considers that PV+ interneurons are the most abundant type of interneuron and provide the  
381 majority of inhibition to pyramidal cells (Markram et al., 2004; Tremblay et al., 2016). Taken  
382 together, we are able to overlay known connectivity patterns with the data shown here to  
383 hypothesize amendments to the core network architecture (Figure 6).

384

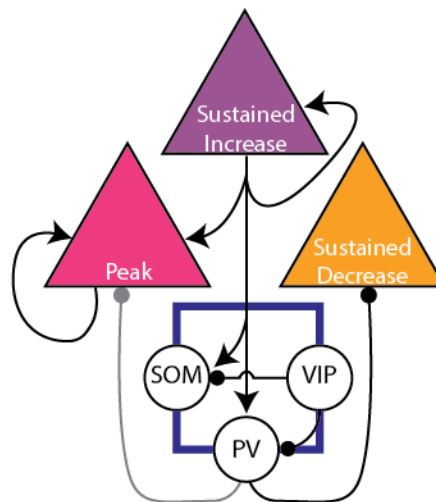

**Figure 6: Predictions for core network architecture.** The network architecture adapted from Figure 1 showing a potential manner by which simulated inhibitory neurons can be divided based on reward timing responses and reported connectivity. The gray line connecting PV+ interneurons is purported to exist given computational work; while not evidenced in the data presented here, it cannot be ruled out. In the current proposed architecture, PV+ interneurons fulfill expectations of the theorized inhibitory population as they produce reward timing with the SI form and inhibit neurons expressing reward timing with the SD form.

385

386

387

## 388 *Concluding Remarks*

389 Reward timing in the primary visual cortex, like many complex responses in the brain, requires  
390 the coordinated activity of many cells. Here we have enriched the phenomenological  
391 characterization of reward timing, extended that work to incorporate the heterogeneity of cell types  
392 within V1, and provided a greater comprehension of how V1 produces reward timing activity  
393 through its circuitry. We now better understand how the various cell types come together to  
394 produce such a representation of time between a cue and a reward.

395

## 396 Materials and Methods

### 397 *Experimental Design and Statistical Analyses*

398 All procedures performed on animals were in accordance with the US NIH Guide for the Care and  
399 Use of Laboratory Animals and were approved by the Animal Care and Use Committee at the  
400 Johns Hopkins University School of Medicine. Male mice (N = 14, between 2 and 6 months old)  
401 were used in this study. For this study, we used four genetic backgrounds which differ in their  
402 expression of the light-activated cation channel, channelrhodopsin-2 (ChR2). One cohort  
403 expressed no ChR2 (wildtype or WT, n = 3 animals), one cohort expressed ChR2 in parvalbumin-  
404 positive interneurons (PV-ChR2, n = 4 animals), one cohort expressed ChR2 in somatostatin-  
405 positive interneurons (SOM-ChR2, n = 4 animals), and one cohort expressed ChR2 in vasoactive-  
406 intestinal-polypeptide-positive interneurons (VIP-ChR2, n = 3 animals). The WT cohort was  
407 composed of C57BL/6 mice (Strain Code: 027, Charles River Laboratories). ChR2-expressing  
408 mice were derived by selectively breeding the following genetic lines: a parvalbumin-Cre  
409 recombinase line (PV-Cre; 008069, Jackson Laboratory, (Hippenmeyer et al., 2005)), a  
410 somatostatin-Cre recombinase line (SOM-Cre; 013044, Jackson Laboratory, (Taniguchi et al.,  
411 2011)), a vasoactive-intestinal-polypeptide-Cre recombinase line (VIP-Cre; 010908, Jackson  
412 Laboratory, (Taniguchi et al., 2011)), and a loxP-STOP-loxP-channelrhodopsin-2-eYFP Cre-  
413 dependent line (ChR2-eYFP, Ai32; 012569, Jackson Laboratory, (Madisen et al., 2010)). The

414 mice of these crosses were on mixed backgrounds composed primarily of C57BL/6 and CD-1. All  
415 mice from all cohorts underwent identical training and training occurred in the light cycle during a  
416 12h light/dark schedule (lights provided between 0700 and 1900).

417  
418 Non-parametric tests (e.g., Kruskal-Wallis test and Wilcoxon Rank-Sum test) are used throughout  
419 the text with an alpha of 0.05 unless otherwise noted. Other statistical analyses include the use  
420 of the Stimulus Associated Latency Test (SALT) as described previously (Kvitsiani et al., 2013)  
421 and bootstrap analyses; both methods are described in more detail below.

422  
423 *Surgical Procedures*

424 Surgical procedures were performed under aseptic conditions and were in accordance with the  
425 Animal Care and Use Committee at the Johns Hopkins University School of Medicine. Animals  
426 underwent two surgeries spaced at least two weeks apart from one another. Prior to either  
427 surgery, mice were anesthetized using a cocktail of ketamine (Ketaset, 80mg/kg) and xylazine  
428 (Anased, 10 mg/kg) and eyes were covered with ophthalmic ointment (Puralube). The first surgery  
429 was performed to affix a head-restraint bar to the animal's skull for training purposes and to mark  
430 sites for future craniotomies. In the first surgery, the hair covering the skull was removed (Nair),  
431 the skin cleaned with alternating 70% ethanol and iodine, then the skin was cut away. Following  
432 this, the periosteum was removed and the skull cleaned with alternating 70% ethanol and  
433 hydrogen peroxide, then the skull was dried with canned air. A total of four sites were marked for  
434 future craniotomies: two for ground screws (arbitrarily marked over the anterior parietal bone) and  
435 two for primary visual cortex (measured as 3mm lateral to lambda, bilaterally). Sites for future  
436 craniotomies were covered in a silicone elastomer (Smooth-On Body Double) and a head-post  
437 was affixed to the anterior portion of the mouse's skull with super glue (Loctite 454). The remaining  
438 bone was covered in super glue. A second surgery was performed to implant recording  
439 electrodes. Briefly, small craniotomies were performed using a dental drill for ground screws and

440 screws were implanted into sites. Next, craniotomies were performed over V1, the dura cleaned  
441 with sterile paper points, and electrodes were brought to the surface of the brain, then implanted  
442 500 $\mu$ m below the cortical surface in accordance with stereotaxic measurements of V1 (Franklin  
443 and Paxinos, 2008). Wires were covered in sterile ophthalmic ointment (Puralube) and encased  
444 in dental cement (Orthojet). Ground screws and ground wires were connected and a headcap  
445 was built of dental cement.

446

#### 447 *Behavioral Task Design*

448 Prior to electrode implantation (between the first and second surgeries), animals were habituated  
449 to head-fixation over the course of 2-3 days, and then were trained that a visual stimulus predicted  
450 a water reward at a fixed delay for 2-3 weeks. Visual stimuli were full-field retinal flashes delivered  
451 monocularly to the left (Cue 1) or right eye (Cue 2) via head-mounted goggles. These goggles  
452 are custom made and consist of a miniature LED glued to the back of a translucent, plastic  
453 hemidome. Licks were recorded on a lickometer via an infrared beam break (IslandMotion);  
454 experiments were controlled through an Arduino Mega microcontroller board (Arduino) and events  
455 were recorded with Neuralynx. In every session, trials were separated by an inter-trial interval  
456 (ITI, between 3 and 8 seconds, uniformly distributed). In order to initiate the next trial (and exit the  
457 ITI), animals had to cease licking for a random interval during the later portion of the ITI (deemed  
458 a “lick lockout”). This lick lockout period was the same across conditioned delays and was used  
459 to discourage non-stimulus-evoked licking, as licks within this period caused the timer to restart  
460 and, thus, a longer ITI. Upon trial initiation, a monocular visual stimulus was either delivered (CS  
461 trials) or withheld (Sham trials), followed by a delay window. CS’s were visual stimuli which lasted  
462 100ms and were delivered, with equal probability, to the left or right eye. The delay to reward was  
463 the same for both CS’s within a session and was held constant for several consecutive sessions  
464 as either the short (1s) or the long (1.5s) delay. Sessions conditioned with the short delay  
465 constitute the “short delay sessions”; those with the long delay, the “long delay sessions”. CS

466 trials were further divided into “paired” and “catch” trials; paired trials being trials in which a small  
467 water reward (~2 $\mu$ L) became available following the delay period, provided that the animal made  
468 at least one lick on the lick port within the delay. Catch trials, however, were trials in which the  
469 reward was withheld regardless of behavior. Licks were never rewarded during Sham trials. At  
470 the conclusion of the delay window on both CS and Sham trials, the animal re-entered the ITI.  
471 Trials in which the animal licked during the delay window are defined as “Hit” trials and trials in  
472 which the animal did not lick during the delay window are defined as “Miss” trials. Unless otherwise  
473 noted, data presented here are from Catch+Hit trials (i.e., trials in which the animal received a  
474 visual stimulus, licked during the delay window, and did not receive a water reward at the end of  
475 that delay).

476  
477 The relative proportion of paired/catch trials and sham trials was systematically varied across  
478 behavioral shaping as well as the requirement to lick within the delay window. In the final form of  
479 the task (and in all sessions reported here), 80% of trials were CS trials (with equal probability of  
480 being paired or catch), with the remaining trials being Sham trials.

481  
482 *Behavioral Measurements*  
483 The timing of individual licks was recorded using a lickometer (IslandMotion) and were recorded  
484 simultaneously with neural data. During the task, animals tended to make one lick bout following  
485 delivery of the CS; the timing of this bout is quantified as the time of the first lick within the bout,  
486 the time of the last lick within the bout, and the mean time between these two licks (“Bout  
487 Midpoint”).

488  
489 *Electrophysiology*  
490 Neural activity was recorded bilaterally from primary visual cortex using custom-built recording  
491 electrodes. Per recording electrode, 16 channels of neural data were recorded at a sampling rate



492 of 32,556 Hz through commercial hardware (Neuralynx). Neurons were offline identified through  
493 manual, 3D cluster-cutting methods through commercial software (Offline Sorter, Plexon).  
494 Electrodes were composed of a connector with 16 recording channels and two ground wires  
495 (Omnetics). Bundles were cut at a  $\sim 45^\circ$  bias to allow for sampling across a depth of approximately  
496 250 $\mu\text{m}$ . In order to optogenetically identify interneuron subtypes, an optic fiber—composed of a  
497 200 $\mu\text{m}$  core diameter glass multimode fiber (ThorLabs) and a 1.25mm ceramic stick ferrule  
498 (Precision Fiber Products)—was glued next to the wire bundle such that the tip of the optic fiber  
499 was abutted next to the majority of the electrode tips of the bundle ( $< 200\mu\text{m}$  tip-to-tip distance  
500 with some wires above optic fiber tip, some next to, and some below optic fiber tip). A schematic  
501 showing the recording strategy can be found in Figure 1A.

502

### 503 *Neural Data Analysis*

504 The following neural data analyses were performed using custom scripts and functions in  
505 MATLAB (Mathworks).

506

507 *Reward Timing Classification.* The form with which a neuron expressed reward timing was  
508 determined using manual classification in a blinded fashion. Specifically, a neuron was randomly  
509 selected from a random session. Then, a peri-stimulus time histogram (PSTH) calculated from  
510 trials that were either Cue 1 Catch+Hit trials, Cue 2 Catch+Hit trials, or Sham+Hit trials was  
511 randomly presented to an experimenter (KJM). This PSTH was then classified as “Not Classified”  
512 (NC), “Sustained Increase” (SI), “Sustained Decrease” (SD), or “Peak” (PK). The remaining  
513 PSTH's were presented, followed by the remaining neurons. These classifications were  
514 performed without knowledge of animal identity, recording session, or delay time.

515

516 *k-Nearest Neighbors Classification.* We sought to cross-validate the human classification  
517 of reward timing neurons. To do so, we implemented a *k*-Nearest Neighbors (kNN) classifier.

518 Briefly, kNN takes classified data as a “training example” to then determine the identity of  
519 unclassified “query points” based on the proximity of query points to classified training example  
520 points. Identity of the query point is defined as a plurality vote of its  $k$  nearest neighbors in the  
521 training example. In our case, we first split data from reward timing neurons into two halves: neural  
522 activity from even trials and neural activity from odd trials. Then, we normalized neural activity  
523 using the area under the ROC curve (AUC, see below) and used principal components analysis  
524 (PCA) for dimensionality reduction. Specifically, we reduced the normalized firing activity from  
525 even trials to the first eight principal components which explained >85% of the variance within the  
526 neural activity; the projection in eight dimensions and human-classified identity of the responses  
527 recorded in even trials served as the training example for the kNN classifier. Then, data from the  
528 odd trials were projected into the 8-dimension subspace (acting as the query points) and were  
529 classified across a range of  $k$ . Specifically, we varied the number of neighbors between 1 and 65;  
530 to avoid ties, we only used an odd number of neighbors in our classification.

531

532 *Neural Report of Time Classification.* To attribute a time in which neurons with reward  
533 timing activity reported the expected delay to reward, we calculated the Neural Report of Time  
534 (NRT). The NRT is the moment taken as the time which neurons return to a baseline level of  
535 activity, for SI and SD response forms, or the time of maximum firing rate from baseline (after the  
536 visual-evoked response), for the PK response form.

537

538 To calculate such a time, neural activity was normalized to the baseline firing rate by calculating  
539 the area under the ROC curve (AUC) using a sliding 100ms window (Cohen et al., 2015; Sadacca  
540 et al., 2018). An AUC value of 0.5 means that the ideal observer would be at chance level to tell  
541 apart two distributions and values above or below 0.5 reflect greater dissimilarity among two  
542 distributions. For our purposes, we found the AUC value between the distribution of spike counts  
543 from a 100ms window of baseline pre-stimulus activity, and a given 100ms of spiking activity

544 across all trials of the same type (e.g., Paired, Cue 1 trials; Catch, Cue 1 trials; etc.). In this way,  
545 we do not rely on the averaging of spike counts in the same way that a PSTH does and thus the  
546 resultant value is more robust against a small subset of trials with many spikes or other forms of  
547 inter-trial spiking variability. Furthermore, this method normalizes the firing rate to a value  
548 bounded by 0 and 1 for every set of trials. As the AUC-normalized firing rate is the magnitude of  
549 difference and not the sign of the difference between an AUC value and 0.5 (which determines  
550 how dissimilar two distributions are), we found the absolute value of the difference between the  
551 AUC vector and a value of 0.5. In doing so, neurons with sustained activation or suppression (SI  
552 or SD neurons, respectively) could be treated with the same algorithm to calculate an NRT. We  
553 operationally defined a difference threshold of 0.15 (true AUC value of 0.35 or 0.65), and, using  
554 this threshold, we then defined the NRT as the first moment in time when the AUC difference  
555 vector fell below the threshold for at least 100ms. For classified PK neurons, the NRT was defined  
556 as the time of the maximum of this AUC difference vector. To avoid conflating reward timing  
557 responses with general visual responses, we set a minimum value for valid NRTs as 0.5s after  
558 stimulus offset. Though only Catch+Hit and Sham+Hit trials were classified, we were able to use  
559 the Catch classifications to calculate a response's NRT in two other trial types: Paired+Hit and  
560 CS+Miss. The algorithm for calculating these NRTs was identical across trial types.

561

562 *Calculation of  $\Delta Spikes$ .* This value is used to determine the average change in spike rate  
563 based on an animal's first lick in Sham+Hit trials. It is defined as follows:

564 
$$\Delta Spikes = \frac{Spikes_{pre} - Spikes_{post}}{N}$$

565 Where  $Spikes_{pre}$  is the number of spikes in the 100ms preceding the first lick within a Sham+Hit  
566 trial,  $Spikes_{post}$  is the number of spikes in the 100ms following the first lick within a Sham+Hit trial,  
567 and  $N$  is the number of trials of Sham+Hit trials within the session.

568

569 *Calculation of the J3 Statistic.* This statistic was developed to determine whether neurons  
570 are the same from one recording session to the next (Moran and Katz, 2014). First the waveforms  
571 of all spikes recorded from two recordings are projected onto reduced dimensions using PCA.  
572 Then, values are calculated as follows:

$$573 \quad J_1 = \sum_k \sum_{k_i} \|s_{k_i} - m_k\|^2$$

$$574 \quad J_2 = \sum_k N_k \|m_k - m\|^2$$

$$575 \quad J_3 = J_2/J_1$$

576 Where  $s_{k_i}$  is the projection in two dimensions of spike  $i$  in session  $k$ ,  $m_k$  is the mean vector of all  
577 spikes ( $N_k$ ) from the  $k^{th}$  session,  $m$  is the overall point mean of the projection, and  $\|\cdot\|$  represents  
578 the Euclidean Distance. In essence, the J3 value is a ratio between the Euclidean distance  
579 between each spike's waveform and the center of the cluster of all other spikes' waveforms from  
580 that neuron to the distance between the two clusters (i.e., a ratio of the inter- and intra-cluster  
581 distance). J3 is maximal when two recordings are tightly packed and far away from one another  
582 in PC space; this reflects that two recordings are unique from one another. However, we utilized  
583 this statistic to determine whether a neuron recorded on one day was the same as a recording  
584 made on the same channel the subsequent day. To do so, we defined a J3 threshold by finding  
585 all "within" J3 values (that is, the J3 value between the first third of the recording's spikes and the  
586 last third of the recording's spikes). The threshold was defined as the 95<sup>th</sup> percentile of this  
587 distribution. That is to say, any neurons which were recorded from the same animal and on the  
588 same channel which had a J3 value that was less than this threshold was deemed the same.

589

590 *Similarity Measurements of Reward Timing Responses.* We sought to assess the similarity  
591 of reward timing responses of a given neuron across the two CS's to assess the consistency of  
592 reward timing responses when different cues predicted the same reward occurring at the same

593 delay. Furthermore, where possible, we sought to assess the stability of a neuron's reward timing  
594 response to the same stimulus across sessions. Reward timing responses of a neuron could differ  
595 (or persist) between cues or across sessions in their presence, form, timing, and shape. For  
596 instance, within a session, reward timing responses may be present within a given neuron to both  
597 cues, exhibit the same response form (e.g., SI) with an overall similar response shape, and report  
598 nominally similar NRT's. Additionally, neurons can express similar responses to the same  
599 stimulus across days. To determine how similar these responses are, we first calculated the  
600 concordance of reward timing forms (for example, how often a SI cell expresses reward timing as  
601 SI for the opposite CS or on a following day). Among the responses which are concordant, we  
602 then determined the similarity in the neuron's report of time by calculating the absolute difference  
603 in NRT's. Finally, within these responses, we quantified the similarity in shape by calculating the  
604 Euclidean distance between the evoked responses. These values were compared with a shuffled  
605 control distribution. Shuffling distributions were calculated by shuffling across neurons that  
606 expressed reward timing in the same form for the same conditioned interval.

607

### 608 *Neuron Identification*

609 Mice in this study (with the exception of the WT cohort) expressed channelrhodopsin-2 in one of  
610 three interneuron populations: PV+, SOM+, and VIP+ interneurons (Figure 1B). This selective  
611 expression allows us to determine how the diversity of V1 inhibitory interneurons intersects with  
612 the theorized network architecture (as schematized in Figure 1C).

613

614 *Optogenetic Interneuron Identification.* Outside of conditioning, brief (1 or 3ms) laser  
615 stimuli were randomly delivered to V1 with an inter-pulse interval randomly drawn from a  
616 distribution (between 5 and 10 seconds, uniformly distributed) while recording from neurons. To  
617 identify putative neurons expressing ChR2, we used the latency to the first spike and the  
618 probability that a laser evoked a spike. To determine significant latencies to the first spike, we

619 used the calculated  $p$ -value from the Stimulus Associated Latency Test (SALT). This test has  
620 been previously described (Kvitsiani et al., 2013); briefly, this test compares the latencies to a first  
621 spike after a laser stimulus to the latencies to a first spike after arbitrary moments in time without  
622 a laser presentation. Specifically, a raster of spiking activity is divided into  $N$  10ms bins and the  
623 time to a first spike within each bin is recorded. Of the  $N$  bins created, one bin is the “test bin” and  
624 begins with the laser stimulus onset and one other bin is the “baseline bin” (a bin from the pre-  
625 laser time period). For all  $N$  bins, a histogram of first-spike latency is created and a modified  
626 Jensen-Shannon divergence is calculated between pairs of these distributions. The divergence  
627 between the “baseline bin” and all other non-test bins creates a null distribution against which the  
628 divergence between the “baseline” and “test” bin is compared. The resultant  $p$ -value represents  
629 the probability that the divergence between the baseline and test bins falls within the null  
630 distribution; we have set a conservative alpha of 0.01 as was used in the first description of the  
631 method (Kvitsiani et al., 2013). In this way, neurons which have fast and consistent spikes (i.e.,  
632 fire quickly and with low jitter) after a laser stimulus will be deemed significant. A caveat to this  
633 statistical measure occurs when a neuron has a relatively low baseline firing rate. In such a  
634 neuron, due to very low firing rates, random, spontaneous activity occurring within the test window  
635 may result in a highly-significant  $p$ -value. For this reason, we also required a neuron to have an  
636 action potential in the window immediately following the laser at least 20% of all laser stimulus  
637 presentations.

638  
639 *Identification of Pyramidal Cells via Spike Width.* In addition to interneuron identification  
640 we sought to define a population of putative pyramidal cells. We did so by calculating a neuron’s  
641 spike width where the spike width is defined as time difference when the average waveform first  
642 crosses 20% of its peak amplitude and last crosses 20% of its valley amplitude. We then set a  
643 threshold at the 75<sup>th</sup> percentile of non-identified interneurons to define a population of putative  
644 pyramidal cells.

645           *Optogenetic Identification of Suppressed Neurons.* Additionally, we were interested in  
646 classifying neurons whose responses were inhibited by activating ChR2-expressing interneurons  
647 (“suppressed neurons”). Specifically, we sought to classify those neurons that putatively do not  
648 express ChR2 (i.e., did not pass one or both of the thresholds set to define interneurons, see  
649 above). To determine this, we also presented 100ms laser pulses after the brief laser  
650 presentations (with the same inter-pulse interval parameters). We then compared the distribution  
651 of spike counts in the 100ms immediately prior to and during laser stimulation with the Wilcoxon  
652 signed-rank test (WSRT). If a significant difference was found, we then compared the total number  
653 of spikes between these two windows across all presentations. Significantly inhibited neurons are  
654 those neurons which passed the WSRT and had fewer spikes during laser presentation than  
655 before laser presentation. Although we cannot resolve the exact nature of this inhibition (either  
656 mono- or polysynaptic), we are able to assess whether populations affected by inhibitory subtype  
657 activation follow predictions of the computational model and whether they reveal functional  
658 specialization of various interneurons. Additionally, we have limited our analysis to only those  
659 neurons which are inhibited by interneuron activation as neurons which are activated during this  
660 stimulation could be activated for one of at least two reasons: (1) they become disinhibited upon  
661 activation of interneurons or (2) they express ChR2 but do not pass our statistical thresholds to  
662 be defined as expressing ChR2.

663  
664           *Bootstrap Procedures.* To determine significant changes in the proportion of neurons  
665 expressing reward timing in the various forms, we used bootstrap analyses. Specifically, for a  
666 given population of “test” neurons (e.g., interneurons or suppressed neurons), we randomly  
667 selected a sample of neurons of the same size (with replacement) from all other neurons recorded  
668 from animals of the same genotype. We then determined the expression of reward timing in this  
669 subsampled distribution and created a bootstrap distribution by repeating the process 1,000

670 times. *P*-values are the probability that values found in the “test” sample would fall in the bootstrap  
671 distribution.

672

### 673 *Histology*

674 Animals were deeply anesthetized using sodium pentobarbital (200mg/kg, Vedco). After which,  
675 animals were transcardially perfused with ice cold phosphate-buffered saline (PBS) followed by  
676 ice cold 4% paraformaldehyde (PFA). Brains were immersion fixed overnight in 4% PFA and were  
677 transferred to 30% sucrose until sectioning. Brains were sectioned on a cryostat into 60 $\mu$ m slices.  
678 Electrode location was verified using Nissl staining, as follows. Sections containing V1 were  
679 selected and mounted on gelatin subbed slides and air dried. These slides were then immersed  
680 in a solution containing 0.1% Cresyl violet and 1% glacial acetic acid dissolved in water for 5  
681 minutes, followed by a 2-minute wash in distilled water, then by 2 minutes in 50% ethanol, then 2  
682 minutes in 70% ethanol. Stained and washed sections were air dried, immersed in xylenes then  
683 coverslipped with Permount Mounting Medium (Electron Microscopy Sciences).

684

685 Expression of ChR2 in interneuron subpopulations was verified with immunohistochemistry, as  
686 follows. Brain sections containing V1 were selected for immunohistochemistry. On day 1 the  
687 sections were washed three times for ten minutes each (3x10 minutes) with PBS then were  
688 blocked in 10% normal goat serum (NGS) in PBS + Triton 0.1% to permeabilize and reduce  
689 background binding to antibodies for 1h. Sections were then incubated with two primary  
690 antibodies overnight at 4°C. Sections for all animals were incubated with a primary GFP antibody  
691 to recognize the eYFP tag of the ChR2 (Chicken polyclonal, 1:2000, Aves Labs (Catalog Number:  
692 GFP-1020)) and one primary antibody to recognize one of three interneuron markers: PV (rabbit  
693 polyclonal, 1:2000, Swant (Catalog Number: PV27)), SOM (rat monoclonal, 1:800, EMD Millipore  
694 (Catalog Number: MAB354)), or VIP (rabbit polyclonal, 1:2000, Immunostar (Catalog Number:  
695 20077)). Sections were then washed 3x10 minutes with PBS, then incubated overnight at 4°C



696 with secondary antibodies: Alexa 488 Goat Anti-Chicken (1:500, Jackson ImmunoResearch  
697 (Catalog Number: 103-545-155)) and Alexa 568 Goat anti Rabbit (PV and VIP) or Rat (SOM)  
698 (1:500, Jackson ImmunoResearch (Catalog Numbers: 111-065-144 and 112-585-143)). Sections  
699 were washed with PBS, mounted on glass slides, and coverslipped with Fluoromount-G mounting  
700 medium (Electron Microscopy Sciences). To control for unspecific staining, sections were stained  
701 in an identical manner except primary antibodies were omitted. Co-expression was as expected  
702 given animal's genotype (Figure 1B).

703 Acknowledgements

704 We wish to thank Harel Shouval, Patricia Janak, Solange Brown, Jeremiah Cohen, Tanya Marton,  
705 and Bilal Bari for insightful discussions of this work and comments on the manuscript.

706

707 Grants

708 Funding for this work was provided by the National Institutes of Health (Grants R01 MH093665  
709 and R01 MH112789 to MGHS) and two training grants (T32 EY007143 and T32 EY017203 to  
710 KJM). Microscopy was performed through the NINDS Multiphoton Imaging Core (P30 NS050274).

711

712 Disclosures

713 The authors declare no competing financial interests.

714

715 References

- 716 Atallah BV, Bruns W, Carandini M, Scanziani M (2012) Parvalbumin-Expressing Interneurons  
717 Linearly Transform Cortical Responses to Visual Stimuli. *Neuron* 73:159–170.
- 718 Barthó P, Hirase H, Monconduit L, Zugaro M, Harris KD, Buzsáki G (2004) Characterization of  
719 Neocortical Principal Cells and Interneurons by Network Interactions and Extracellular  
720 Features. *Journal of Neurophysiology* 92:600–608.
- 721 Bock DD, Lee W-CA, Kerlin AM, Andermann ML, Hood G, Wetzel AW, Yurgenson S, Soucy ER,  
722 Kim HS, Reid RC (2011) Network anatomy and in vivo physiology of visual cortical  
723 neurons. *Nature* 471:177–182.
- 724 Chubykin AA, Roach EB, Bear MF, Hussain Shuler MG (2013) A Cholinergic Mechanism for  
725 Reward Timing within Primary Visual Cortex. *Neuron* 77:723–735.
- 726 Cohen JY, Amoroso MW, Uchida N (2015) Serotonergic neurons signal reward and punishment  
727 on multiple timescales. *eLife* 4 Available at:  
728 <https://www.ncbi.nlm.nih.gov/pubmed/25714923>.
- 729 Felleman DJ, Van Essen DC (1991) Distributed hierarchical processing in the primate cerebral  
730 cortex. *Cereb Cortex* 1:1–47.
- 731 Fino E, Yuste R (2011) Dense Inhibitory Connectivity in Neocortex. *Neuron* 69:1188–1203.
- 732 Fiser A, Mahringer D, Oyibo HK, Petersen AV, Leinweber M, Keller GB (2016) Experience-  
733 dependent spatial expectations in mouse visual cortex. *Nature Neuroscience* 19:1658–  
734 1664.
- 735 Franklin KBJ, Paxinos G (2008) *The Mouse Brain in Stereotaxic Coordinates*, Third Edition.  
736 New York, NY: Academic Press.
- 737 Gavornik JP, Bear MF (2014a) Higher brain functions served by the lowly rodent primary visual  
738 cortex. *Learn Mem* 21:527–533.
- 739 Gavornik JP, Bear MF (2014b) Learned spatiotemporal sequence recognition and prediction in  
740 primary visual cortex. *Nature Neuroscience* 17:732–737.
- 741 Gdalyahu A, Tring E, Polack P-O, Gruver R, Golshani P, Fanselow MS, Silva AJ, Trachtenberg  
742 JT (2012) Associative Fear Learning Enhances Sparse Network Coding in Primary  
743 Sensory Cortex. *Neuron* 75:121–132.
- 744 Goard MJ, Pho GN, Woodson J, Sur M (2016) Distinct roles of visual, parietal, and frontal motor  
745 cortices in memory-guided sensorimotor decisions Mrosovsky TD, ed. *eLife* 5:e13764.
- 746 Goltstein PM, Meijer GT, Pennartz CM (2018) Conditioning sharpens the spatial representation  
747 of rewarded stimuli in mouse primary visual cortex Lee D, King AJ, Lee D, eds. *eLife*  
748 7:e37683.
- 749 Guo W, Robert B, Polley DB (2019) The Cholinergic Basal Forebrain Links Auditory Stimuli with  
750 Delayed Reinforcement to Support Learning. *Neuron* 0 Available at:

- 751 [https://www.cell.com/neuron/abstract/S0896-6273\(19\)30594-X](https://www.cell.com/neuron/abstract/S0896-6273(19)30594-X) [Accessed August 6,  
752 2019].
- 753 Hippenmeyer S, Vrieseling E, Sigrist M, Portmann T, Laengle C, Ladle DR, Arber S (2005) A  
754 Developmental Switch in the Response of DRG Neurons to ETS Transcription Factor  
755 Signaling. *PLoS biology* 3:e159.
- 756 Hofer SB, Ko H, Pichler B, Vogelstein J, Ros H, Zeng H, Lein E, Lesica NA, Mrcic-Flogel TD  
757 (2011) Differential connectivity and response dynamics of excitatory and inhibitory  
758 neurons in visual cortex. *Nature Neuroscience* 14:1045–1052.
- 759 Hubel DH, Wiesel TN (1959) Receptive fields of single neurones in the cat's striate cortex. *The*  
760 *Journal of Physiology* 148:574–591.
- 761 Hubel DH, Wiesel TN (1965) Receptive fields and functional architecture in two nonstriate visual  
762 areas (18 and 19) of the cat. *Journal of Neurophysiology* 28:229–289.
- 763 Huertas MA, Hussain Shuler MG, Shouval HZ (2015) A Simple Network Architecture Accounts  
764 for Diverse Reward Time Responses in Primary Visual Cortex. *The Journal of*  
765 *Neuroscience: The Official Journal of the Society for Neuroscience* 35:12659–12672.
- 766 Hussain Shuler MG (2016) Timing in the visual cortex and its investigation. *Current Opinion in*  
767 *Behavioral Sciences* 8:73–77.
- 768 Ji D, Wilson MA (2007) Coordinated memory replay in the visual cortex and hippocampus  
769 during sleep. *Nature Neuroscience* 10:100–107.
- 770 Kass MD, Rosenthal MC, Pottackal J, McGann JP (2013) Fear Learning Enhances Neural  
771 Responses to Threat-Predictive Sensory Stimuli. *Science* 342:1389–1392.
- 772 Kay LM, Laurent G (1999) Odor- and context-dependent modulation of mitral cell activity in  
773 behaving rats. *Nature Neuroscience* 2:1003–1009.
- 774 Kvitsiani D, Ranade S, Hangya B, Taniguchi H, Huang JZ, Kepecs A (2013) Distinct behavioural  
775 and network correlates of two interneuron types in prefrontal cortex. *Nature* 498:363–  
776 366.
- 777 Lee CR, Margolis DJ (2016) Pupil Dynamics Reflect Behavioral Choice and Learning in a  
778 Go/NoGo Tactile Decision-Making Task in Mice. *Front Behav Neurosci* 10 Available at:  
779 <https://www.frontiersin.org/articles/10.3389/fnbeh.2016.00200/full> [Accessed July 10,  
780 2019].
- 781 Lee S-H, Kwan AC, Zhang S, Phoumthippavong V, Flannery JG, Masmanidis SC, Taniguchi  
782 H, Huang ZJ, Zhang F, Boyden ES, Deisseroth K, Dan Y (2012) Activation of specific  
783 interneurons improves V1 feature selectivity and visual perception. *Nature* 488:379–383.
- 784 Levy JM, Zold CL, Namboodiri VMK, Hussain Shuler MG (2017) The Timing of Reward-Seeking  
785 Action Tracks Visually Cued Theta Oscillations in Primary Visual Cortex. *J Neurosci*  
786 37:10408–10420.

- 787 Liu C-H, Coleman JE, Davoudi H, Zhang K, Hussain Shuler MG (2015) Selective Activation of a  
788 Putative Reinforcement Signal Conditions Cued Interval Timing in Primary Visual Cortex.  
789 *Current Biology* 25:1551–1561.
- 790 Madisen L, Zwingman TA, Sunkin SM, Oh SW, Zariwala HA, Gu H, Ng LL, Palmiter RD,  
791 Hawrylycz MJ, Jones AR, Lein ES, Zeng H (2010) A robust and high-throughput Cre  
792 reporting and characterization system for the whole mouse brain. *Nature Neuroscience*  
793 13:133–140.
- 794 Makino H, Komiyama T (2015) Learning enhances the relative impact of top-down processing in  
795 the visual cortex. *Nature Neuroscience* 18:1116–1122.
- 796 Markram H, Toledo-Rodriguez M, Wang Y, Gupta A, Silberberg G, Wu C (2004) Interneurons of  
797 the neocortical inhibitory system. *Nature Reviews Neuroscience* 5:793–807.
- 798 McGann JP (2015) Associative learning and sensory neuroplasticity: how does it happen and  
799 what is it good for? *Learn Mem* 22:567–576.
- 800 Moran A, Katz DB (2014) Sensory Cortical Population Dynamics Uniquely Track Behavior  
801 across Learning and Extinction. *The Journal of neuroscience : the official journal of the*  
802 *Society for Neuroscience* 34:1248–1257.
- 803 Namboodiri VMK, Huertas MA, Monk KJ, Shouval HZ, Hussain Shuler MG (2015) Visually Cued  
804 Action Timing in the Primary Visual Cortex. *Neuron* 86:319–330.
- 805 Packer AM, Yuste R (2011) Dense, Unspecific Connectivity of Neocortical Parvalbumin-Positive  
806 Interneurons: A Canonical Microcircuit for Inhibition? *J Neurosci* 31:13260–13271.
- 807 Pais-Vieira M, Lebedev MA, Wiest MC, Nicolelis MAL (2013) Simultaneous Top-down  
808 Modulation of the Primary Somatosensory Cortex and Thalamic Nuclei during Active  
809 Tactile Discrimination. *J Neurosci* 33:4076–4093.
- 810 Pakan JMP, Currie SP, Fischer L, Rochefort NL (2018) The Impact of Visual Cues, Reward, and  
811 Motor Feedback on the Representation of Behaviorally Relevant Spatial Locations in  
812 Primary Visual Cortex. *Cell Reports* 24:2521–2528.
- 813 Pfeffer CK, Xue M, He M, Huang ZJ, Scanziani M (2013) Inhibition of inhibition in visual cortex:  
814 the logic of connections between molecularly distinct interneurons. *Nature Neuroscience*  
815 16:1068–1076.
- 816 Polley DB, Heiser MA, Blake DT, Schreiner CE, Merzenich MM (2004) Associative learning  
817 shapes the neural code for stimulus magnitude in primary auditory cortex. *PNAS*  
818 101:16351–16356.
- 819 Poort J, Khan AG, Pachitariu M, Nemri A, Orsolich I, Krupic J, Bauza M, Sahani M, Keller GB,  
820 Mrsic-Flogel TD, Hofer SB (2015) Learning Enhances Sensory and Multiple Non-  
821 sensory Representations in Primary Visual Cortex. *Neuron* 86:1478–1490.
- 822 Ross JM, Fletcher ML (2018) Learning-Dependent and -Independent Enhancement of  
823 Mitral/Tufted Cell Glomerular Odor Responses Following Olfactory Fear Conditioning in  
824 Awake Mice. *J Neurosci* 38:4623–4640.

- 825 Rutkowski RG, Weinberger NM (2005) Encoding of Learned Importance of Sound by Magnitude  
826 of Representational Area in Primary Auditory Cortex. *Proceedings of the National*  
827 *Academy of Sciences of the United States of America* 102:13664–13669.
- 828 Sadacca BF, Wied HM, Lopatina N, Saini GK, Nemirovsky D, Schoenbaum G (2018)  
829 Orbitofrontal neurons signal sensory associations underlying model-based inference in a  
830 sensory preconditioning task. *eLife* 7 Available at:  
831 <https://www.ncbi.nlm.nih.gov/pubmed/29513220>.
- 832 Shuler MG, Bear MF (2006) Reward Timing in the Primary Visual Cortex. *Science* 311:1606–  
833 1609.
- 834 Taniguchi H, He M, Wu P, Kim S, Paik R, Sugino K, Kvitsani D, Fu Y, Lu J, Lin Y, Miyoshi G,  
835 Shima Y, Fishell G, Nelson SB, Huang ZJ (2011) A Resource of Cre Driver Lines for  
836 Genetic Targeting of GABAergic Neurons in Cerebral Cortex. *Neuron* 71:995–1013.
- 837 Tremblay R, Lee S, Rudy B (2016) GABAergic Interneurons in the Neocortex: From Cellular  
838 Properties to Circuits. *Neuron* 91:260–292.
- 839 Vincis R, Fontanini A (2016) Associative learning changes cross-modal representations in the  
840 gustatory cortex Mrcic-Flogel TD, ed. *eLife* 5:e16420.
- 841 West DC, Mercer A, Kirchhecker S, Morris OT, Thomson AM (2006) Layer 6 Cortico-thalamic  
842 Pyramidal Cells Preferentially Innervate Interneurons and Generate Facilitating EPSPs.  
843 *Cereb Cortex* 16:200–211.
- 844 Wiest MC, Thomson E, Pantoja J, Nicolelis MAL (2010) Changes in S1 Neural Responses  
845 During Tactile Discrimination Learning. *Journal of Neurophysiology* 104:300–312.
- 846 Wilson NR, Runyan CA, Wang FL, Sur M (2012) Division and subtraction by distinct cortical  
847 inhibitory networks *in vivo*. *Nature* 488:343–348.
- 848 Xu X, Roby KD, Callaway EM (2010) Immunochemical characterization of inhibitory mouse  
849 cortical neurons: Three chemically distinct classes of inhibitory cells. *Journal of*  
850 *Comparative Neurology* 518:389–404.
- 851 Zold CL, Hussain Shuler MG (2015) Theta Oscillations in Visual Cortex Emerge with Experience  
852 to Convey Expected Reward Time and Experienced Reward Rate. *J Neurosci* 35:9603–  
853 9614.
- 854
- 855

856 Figure Supplements

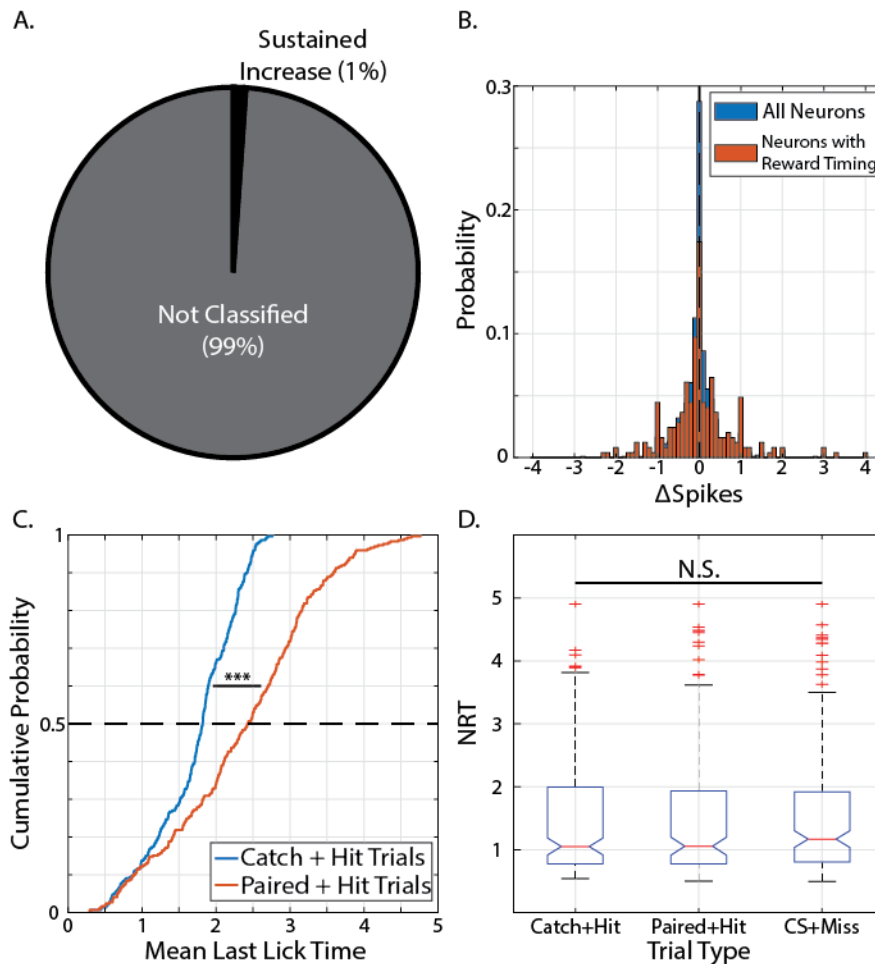

**Figure 3, Supplemental Figure 1: Reward timing activity is not explained by licking behavior.** (A) Pie chart showing classification of responses recorded during Sham+Hit trials (trials in which no CS was given, but an animal licked). (B) Distribution of  $\Delta$ Spikes (a variable which reflects the average change in the number of spikes before and after a first lick, see Methods) for all recorded neurons (blue) and neurons with reward timing responses (orange). Vertical, dashed line represents medians of distributions; neither distribution is significantly different from zero ( $p$ 's > 0.05, Wilcoxon Signed-Rank test). (C) Cumulative distribution plots of Mean Last Licks within Catch+Hit trials (blue) and Paired+Hit Trials (orange) show that animals have longer lick bouts for Paired+Hit Trials compared to Catch+Hit trials ( $Z = -13.34$ ,  $p = 1.30 \times 10^{-40}$ , Wilcoxon Sign-Rank test). (D) Boxplot of distributions of NRTs calculated from the different trial types from neurons with reward timing responses. Box limits in box plots represent 25th and 75th percentiles, lines correspond to roughly  $\pm 2.7\sigma$ . N.S.: Not Significant; \*\*\*:  $p < 0.001$ , Wilcoxon Sign-Rank test.

857

858

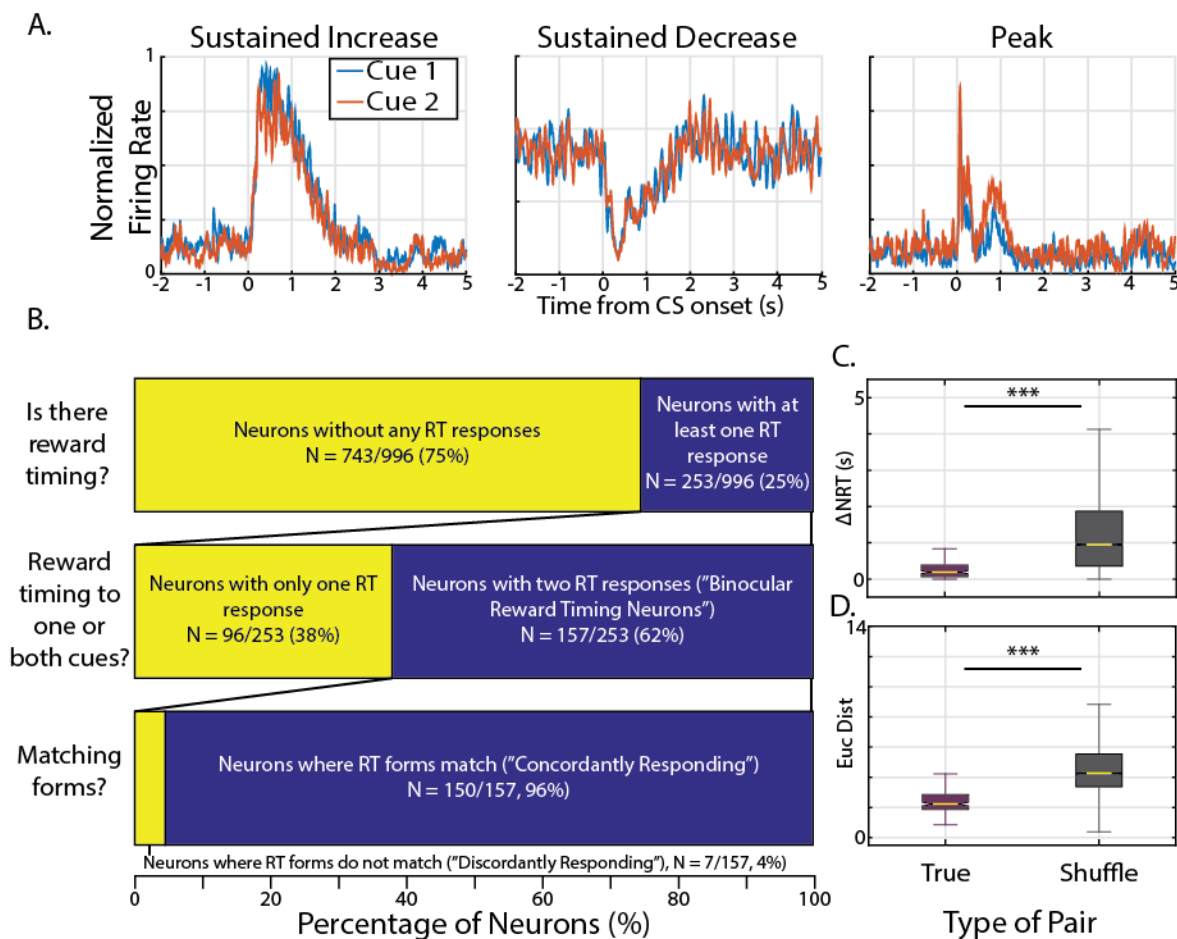

**Figure 3, Supplemental Figure 2: Different cues elicit responses similar in form, timing, and shape within binocular reward timing neurons.** (A) Normalized activity from three example neurons which have similar responses to Cue 1 as they do for Cue 2. (B) Bar chart representing the proportion of neurons with reward timing responses (top); of those cells, the proportion of cells with two classified responses (“Binocular Reward Timing Neurons”, middle); and, of the Binocular Reward Timing Neurons, the proportion of neurons which express reward timing as the same form to either CS (“Concordantly Responding”). (C - D) Box plots showing differences in the absolute difference of calculated NRT’s (“ΔNRT”, C) and Euclidean distances (D) for “true pairs” (Cue 1 vs Cue 2 of the same neuron) and “shuffle pairs” (Cue 1 vs Cue 2 of neurons with same reward timing form and same conditioned interval). Box limits in box plots represent 25th and 75th percentiles, lines correspond to roughly  $\pm 2.7\sigma$ . For demonstration purposes, outliers have been removed from plot. \*\*\* in panel C:  $Z = -12.67$ ,  $p = 8.60 \times 10^{-37}$ , Wilcoxon rank-sum test. \*\*\* in panel D:  $Z = -16.97$ ,  $p = 1.39 \times 10^{-64}$ .

859

860



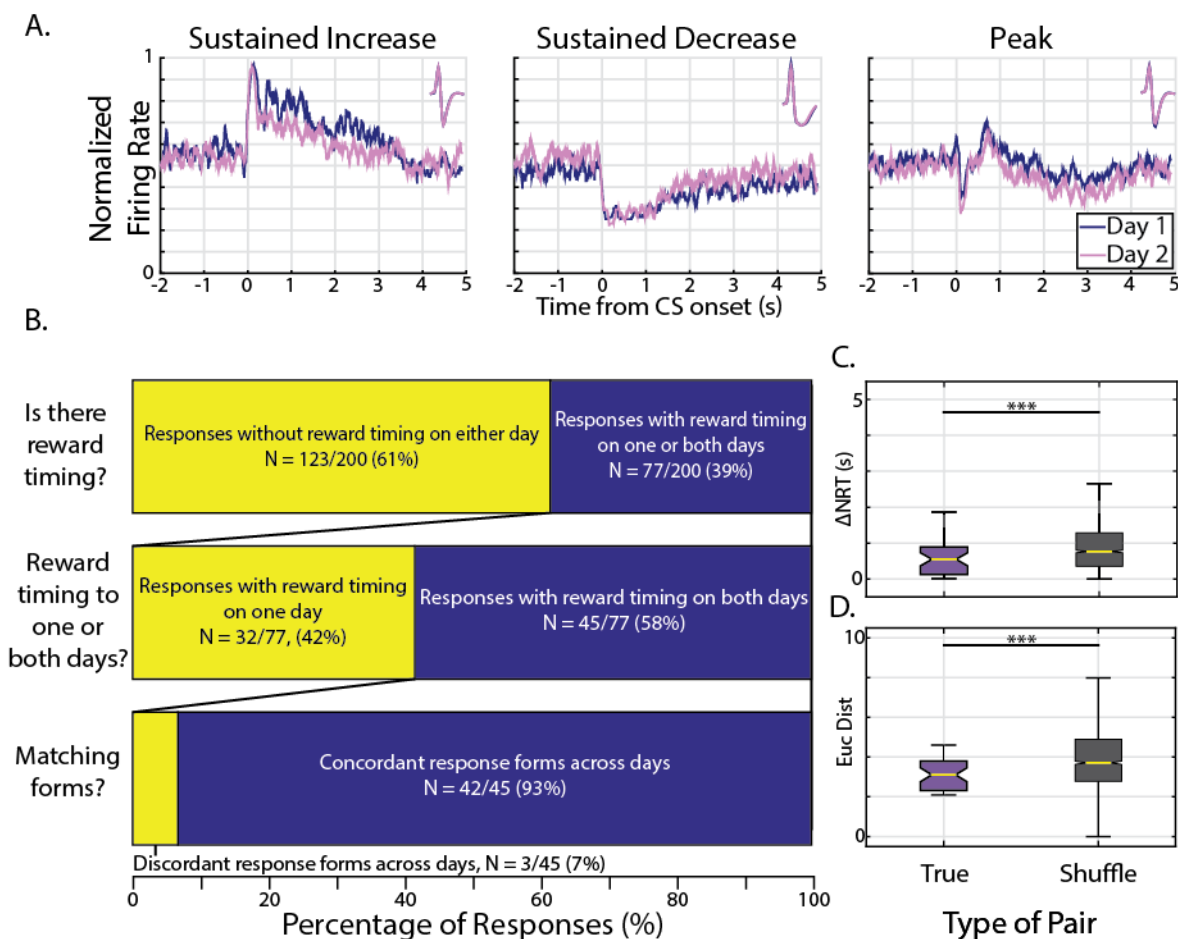

**Figure 3, Supplemental Figure 3: Reward timing is stable in form, timing, and shape across recording sessions.** (A) Normalized activity from three example neurons deemed to be the same neuron from different recording sessions which express reward timing similarly on day 1 (purple) and day 2 (pink); average waveforms from entire session shown in insets. (B) Bar chart representing, of all CS responses from repeat neurons, the proportion of responses with reward timing on at least one day (top); of those responses with reward timing on at least one day, the proportion of responses which had reward timing on both days; and of those responses, the proportion of responses which were classified as having the same form (“Concordant Responses”). (C - D) Box plots showing differences in the absolute difference of calculated NRT’s (“ $\Delta$ NRT”, C) and Euclidean distances (D) for “true pairs” (Day 1 vs Day 2 for the same response) and “shuffle pairs” (Day 1 vs Day 2 of responses with same reward timing form and same conditioned interval). Box limits in box plots represent 25th and 75th percentiles, lines correspond to roughly  $\pm 2.7\sigma$ . For demonstration purposes, outliers have been removed from plot. \*\*\* in panel C:  $Z = -2.73$ ,  $p = 6.40 \times 10^{-3}$ , Wilcoxon rank-sum test. \*\*\* in panel D:  $Z = -3.61$ ,  $p = 3.07 \times 10^{-4}$ .

861

862

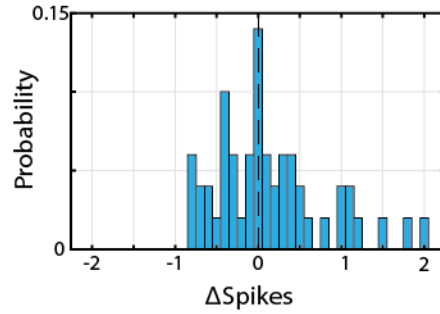

**Figure 4, Supplemental Figure 1: Identified interneuron activity is not influenced by licking behavior.** Distribution of  $\Delta\text{Spikes}$  (a variable which reflects the average change in the number of spikes before and after a first lick, see Methods) for all identified interneurons. Vertical, dashed line represents median of distributions which is not significantly different from zero ( $Z = 0.926$ ,  $p = 0.355$ , Wilcoxon Signed-Rank test).

863

864

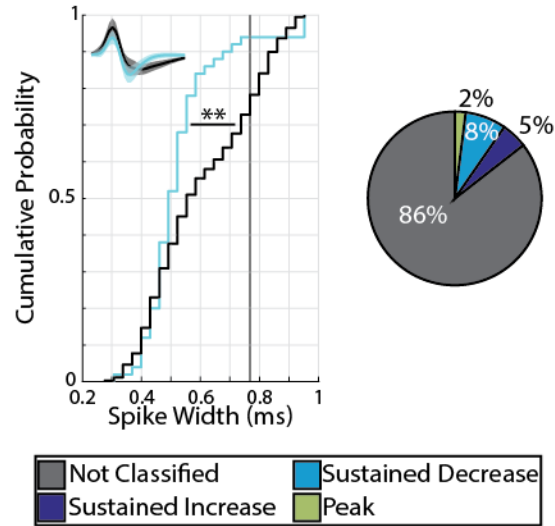

**Figure 4, Supplemental Figure 2: Putative pyramidal neurons express reward timing in all forms.** Left: Cumulative distribution plots of calculated Spike Width for identified interneurons (cyan) and all other neurons (black). Identified interneurons have significantly narrower spike widths compared to unidentified counterparts ( $Z = -2.61$ ,  $p = 9.2 \times 10^{-3}$ , Wilcoxon Rank-Sum test). Vertical, black line shows threshold value to define putative pyramidal cells (neurons with spike widths in the top quartile of distribution). Inset at top left shows mean  $\pm$  standard deviation of average waveform for identified interneurons (cyan) or putative pyramidal cells (black). Right: Pie chart showing distribution of reward timing forms within putative excitatory cells. \*\*:  $p < 0.01$ , Wilcoxon Rank-Sum test

865

866
